## MANF regulates unfolded protein response and neuronal survival through its ER-located receptor IRE1 $\alpha$

Vera Kovaleva<sup>1</sup>, Li-Ying Yu<sup>1\*</sup>, Larisa Ivanova<sup>2\*</sup>, Jinhan Nam<sup>1</sup>, Ave Eesmaa<sup>1</sup>, Esa-Pekka Kumpula<sup>1</sup>, Juha Huiskonen<sup>1</sup>, Päivi Lindholm<sup>1</sup>, Merja Voutilainen<sup>1,3</sup>, Mati Karelson<sup>2</sup>, Mart Saarma<sup>1</sup>

<sup>1</sup>Institute of Biotechnology, HiLIFE, University of Helsinki, 00014 Helsinki, Finland

<sup>2</sup>Institute of Chemistry, University of Tartu, 50411 Tartu, Estonia

<sup>3</sup>Division of Pharmacology and Pharmacotherapy, Faculty of Pharmacy, University of Helsinki, 00014 Helsinki, Finland

\*These authors contributed equally to this work

### Abstract

Mesencephalic astrocyte-derived neurotrophic factor (MANF) is an endoplasmic reticulum (ER)-located protein with cytoprotective effects in numerous cell types *in vitro* and in models of neurodegeneration and diabetes *in vivo*. So far, the exact mode of its action has remained elusive and plasma membrane or ER-located receptors of MANF have not been identified. We have found that MANF can directly interact with transmembrane unfolded protein response (UPR) receptor IRE1 $\alpha$  and compete with the major ER chaperone BiP (GRP78) for the interaction with IRE1 $\alpha$ . With lower affinities MANF can also interact with other UPR receptors, PERK and ATF6. Using molecular modeling and mutagenesis analysis, we have identified the exact structural MANF regions involved in its binding to the luminal domain of IRE1 $\alpha$ . MANF attenuates UPR signaling by decreasing IRE1 $\alpha$  oligomerization and IRE1 $\alpha$  phosphorylation. MANF mutant deficient in IRE1 $\alpha$  binding cannot regulate IRE1 $\alpha$  oligomerization and fails to protect neurons from ER stress induced death. Importantly, we found that MANF-IRE1 $\alpha$  interaction is also crucial for the survival promoting action of MANF for dopamine neurons in an animal model of Parkinson's disease. Our data reveal a novel mechanism of IRE1 $\alpha$  regulation during ER stress and demonstrate the intracellular mode of action of MANF as a modulator of UPR and neuronal cell survival through the direct interaction with IRE1 $\alpha$  and regulation of its activity. Furthermore, our data explain why MANF in contrast to other growth factors has no effects on naive cells and rescues only ER stressed or injured cells.

### Introduction

Endoplasmic reticulum (ER) is the largest intracellular compartment in most eukaryotic cells, dealing with protein secretion and folding as well as lipid biosynthesis and calcium homeostasis. Upon overloading of ER with misfolded proteins, a process occurring in many physiological and pathological conditions, a signaling machinery called unfolded protein response (UPR) is activated. The UPR aims for restoring cellular homeostasis through the activation of pro-survival signalling cascades, though when activated chronically it leads to apoptosis. UPR signalling in mammalian cells occurs through three ER transmembrane sensors: IRE1 $\alpha$  (inositol-requiring enzyme 1 $\alpha$ ), PERK (PKR-like endoplasmic reticulum kinase) and ATF6 (activating transcription factor 6) (Walter and Ron, 2011). The activation of UPR sensors induces ER chaperones, triggers the protein degradation machinery and attenuates protein synthesis, thereby reducing the misfolded protein load in ER. IRE1 branch of UPR is the most evolutionarily conserved, present even in yeast cells (Cox et al., 1993). The major ER chaperone binding immunoglobulin protein (BiP), alias GRP78, is classically believed to prevent IRE1 $\alpha$  activation and signaling in basal conditions. The dissociation of BiP from luminal domain of IRE1 $\alpha$  upon ER stress leads to dimerization/oligomerization of luminal domains of IRE1 $\alpha$ , resulting in trans-autophosphorylation of cytoplasmic domains of IRE1 $\alpha$ , increasing IRE1 $\alpha$  endoribonuclease activity and triggering unconventional splicing of X-box-binding protein 1 (XBP1) mRNA (Bertolotti et al., 2000). IRE1 $\alpha$  is a unique transmembrane receptor where the cytoplasmic domain is an enzyme, possessing both serine-threonine kinase and endoribonuclease activities. As

endoribonuclease, it cuts out intron from mRNA of X-box-binding protein 1 (XBP1), triggering UPR activation. Through its endoribonuclease activity, IRE1 $\alpha$  also causes mRNA decay, allowing to decrease the protein synthesis load during ER stress. Phosphorylation of IRE1 $\alpha$  within the kinase activation loop results in increased endoribonuclease activity (Prischi et al., 2014). Despite the fact that IRE1 being discovered almost 30 years ago, the exact mechanism of its activation is not entirely clear. There are a few mutually exclusive theories, supporting different modes of IRE1 $\alpha$  activation (Karagöz et al., 2017; Amin-Wetzel et al., 2017; Preissler and Ron, 2018; Carrara et al., 2015b; Kopp et al., 2018). Recently unfolded proteins and chaperones such as Heat shock protein 47 (Hsp47) and protein disulfide isomerase A6 (PDIA6) were shown to play a role in the regulation of IRE1 $\alpha$  activation (Sepulveda et al., 2018, Eletto et al., 2014). Unfolded proteins were shown to bind IRE1 $\alpha$  LD, and through the induction of allosteric changes promote IRE1 $\alpha$  oligomerization (Karagöz et al., 2017). Heat shock protein 47 (Hsp47) enhances IRE1 $\alpha$  activation through direct interaction and displacement of IRE1 $\alpha$  attenuator BiP from the complex (Sepulveda et al., 2018). Protein disulfide isomerase A6 (PDIA6) has been shown to attenuate IRE1 $\alpha$  signaling upon ER stress after BiP dissociation from IRE1 $\alpha$  through the reduction of disulfide bonds formed by Cys148 residues from individual IRE1 $\alpha$  monomers in the oligomeric IRE1 $\alpha$ , thus converting IRE1 $\alpha$  back to monomeric form (Eletto et al., 2014).

Mesencephalic astrocyte-derived neurotrophic factor (MANF) (Petrova et al., 2003) together with cerebral dopamine neurotrophic factor (CDNF) (Lindholm et al., 2007) forms a novel family of evolutionary conserved ER-located, but also secreted unconventional neurotrophic factors (Lindahl et al., 2017). In animal models MANF promotes the survival of dopamine neurons, which degenerate in Parkinson's disease (PD) (Voutilainen et al., 2009) and protects pancreatic beta cells from death (Lindahl et al., 2014, Danilova et al., 2019). MANF is up-regulated in ER stress conditions, bypassing general down-regulation of protein synthesis (Apostolou et al., 2008). MANF has been shown to protect ER stressed cells and alleviate UPR markers in a number of *in vitro* models (Mizobuchi et al., 2007; Apostolou et al., 2008; Tadimalla et al., 2008; Hellmann et al., 2011; Pakarinen et al., 2020). Recent data also show that MANF is a key regulator of metabolic and immune homeostasis in ageing. Moreover, MANF protects against liver inflammation and fibrosis, suggesting a therapeutic application for MANF in age-related metabolic diseases (Sousa-Victor et al. 2019). In MANF-deficient mice UPR pathways are chronically activated in beta cells, in neurons and several other cell types demonstrating that MANF is a crucial regulator of UPR *in vivo* (Lindahl et al., 2014; Danilova et al., 2019; Pakarinen et al., 2020).

To date, the exact mode of action of this protein remains poorly understood. According to our previously published data, in human beta-cells MANF is mostly localized inside the cells in the ER (Danilova et al., 2019), which implies that ER is its main site of action. In line with this MANF added extracellularly to superior cervical ganglion (SCG) neurons had no prosurvival effect, but when the plasmid encoding MANF or MANF protein were microinjected they protected the neurons from apoptosis, including ER stress induced apoptosis (Hellmann et al., 2011; Mätlik et al., 2015; Eesmaa et al., under review). It is not clear how MANF exerts its protective effects mostly acting in the ER lumen. Since MANF can be secreted it acts extracellularly as well but this mechanism is also entirely unclear. In ER stress MANF secretion increases and MANF added extracellularly to cultured pancreatic beta cells has clear cytoprotective and proliferative effect (Lindahl et al., 2014), showing that MANF can act via unknown plasma membrane receptors or enter the cells, translocate to the ER and act there. MANF interacts with major ER chaperone BiP (Glembotski et al., 2012) and other chaperones, including PDIA6 (Bell et al., 2019; Eesmaa et al., under review). Recently MANF was shown to prolong the interaction of BiP with client proteins, thus regulating protein-folding

homeostasis (Yan et al. 2019). All these findings support the hypothesis that the major locus operandi of MANF is the ER lumen.

Interestingly, MANF knockout mice similarly to both IRE1 $\alpha$  or XBP1 knockout mice have diabetic-like phenotypes. All three knockout models have endocrine pancreas alterations, altered glucose metabolism and insulin secretion, as well as lipid abnormalities in liver (Bommiasamy & Popko, 2011; Hetz et al., 2012; Lindahl et al., 2014; Danilova et al., 2019; Sousa-Victor et al. 2019). These data provide genetic evidence for MANF and IRE1 $\alpha$  being involved in similar functions and signaling pathways in cells. MANF-IRE1 $\alpha$  crosstalk is further supported by the notion that in MANF knockout mice IRE1 $\alpha$  branch of UPR is activated first, and PERK and ATF6 pathways are activated later (Lindahl et al., 2014). Upregulation of spliced XBP1 (sXBP1) downstream to IRE1 $\alpha$  was shown to occur first not only for full knockout mice but also for pancreas-specific (Danilova et al., 2019) and for central nervous system-specific MANF ablation (Pakarinen et al., 2020).

We have recently shown that in ER stressed mouse cultured dopamine neurons MANF is able to reduce the expression of *sXbp1*, *Atf6* as well as *Bip* mRNA. In a similar way, chemical inhibition of both IRE1 $\alpha$  and PERK pathways abolishes the anti-apoptotic effect of MANF in mouse sympathetic neurons and in dopamine neurons (Eesmaa et al., under review). These data indicate that UPR pathways are involved in the pro-survival action of MANF. Interestingly, the interaction with BiP was not required for the prosurvival activity of MANF (Eesmaa et al., under review). Considering the protective effects of MANF in ER stressed cells, its interaction with several chaperones and the genetic evidence, we tested the hypothesis that MANF directly binds to IRE1 $\alpha$  and through that regulates the IRE1 $\alpha$  branch of UPR.

Here we show that MANF directly binds to IRE1 $\alpha$  with high affinity and also interacts with PERK and ATF6 with lower affinities. We found that MANF competes with BiP for the interaction with IRE1 $\alpha$ . We confirm that through the direct interaction MANF regulates UPR by inhibiting the activity of IRE1 $\alpha$  through regulating its phosphorylation, oligomerization and downstream signaling. MANF mutant deficient in IRE1 $\alpha$  binding is unable to regulate IRE1 $\alpha$  activity and lacks pro-survival action *in vitro* in SCG and dopamine neurons and is not biologically active *in vivo* in an animal model of Parkinson's disease. Thus, our results reveal the mode of action of MANF in the ER and bring to light MANF as a novel regulator of IRE1 $\alpha$  activity.

## Results

### MANF directly interacts with luminal domain of IRE1 $\alpha$

To investigate the mechanism how MANF is regulating UPR and crosstalking with the UPR machinery, we started by testing for direct interaction between MANF and luminal domains (LDs) of UPR sensors. We expressed and purified from *CHO* cells the luminal domains of all three UPR sensors, human IRE1 $\alpha$ , PERK and ATF6. We confirmed that the proteins are highly pure and intact (Supplementary Fig. 1a). We also tested their glycosylation status using peptide N-Glycosidase F (PNGase F) assay. We found that IRE1 $\alpha$  LD and PERK LD were not N-glycosylated, whereas we confirmed the earlier findings that ATF6 LD was glycosylated (Supplementary Fig. 1a). Glycosylated glial cell line-derived neurotrophic factor (GDNF) served as the positive control for the assay. To assess the biological activity of LD of UPR sensors we tested their interactions with their known binding partner BiP using microscale thermophoresis (MST) and purified recombinant proteins. We found that BiP was interacting with fluorescently labeled through His-tag UPR sensors with high affinities: BiP-IRE1 $\alpha$  LD  $K_d=119.3\pm 34.0$  nM, BiP-PERK LD  $K_d=14.1\pm 11.5$  nM and BiP-ATF6 LD

$K_d=21.0\pm 15.2$  nM (Fig. 1a, b, c). Notably, the affinities of BiP for these mammalian cell produced UPR receptors were about 10-100 times higher than those reported for *E.coli* produced proteins (Cararra et al., 2015).

To determine whether there is a direct interaction between MANF and LDs of UPR sensors, we used mammalian cell-line produced recombinant purified human MANF and LDs of IRE1 $\alpha$ , PERK and ATF6 (Supplementary Fig. 1a). MANF prepared this way was biologically active, as shown by survival assay in SCG sympathetic neurons and dopamine neurons (Eesmaa et al., under review). Fluorescently labeled through His-tag LDs of UPR sensors were incubated with increasing concentrations of MANF and the binding affinities were measured using MST. We observed that MANF is interacting with all three UPR sensors, and the highest affinity  $K_d=94.7\pm 39.6$  nM was observed for MANF-IRE1 $\alpha$  LD interaction (Fig. 1d). MANF was interacting with PERK and ATF6 LDs with lower affinities,  $K_d=384.3\pm 172.9$  nM and,  $K_d=346.6\pm 134.3$  nM, respectively (Fig. 1e, f). This is the first demonstration of direct interactions between MANF and UPR sensors.

Taking into account the similarities in MANF and IRE1 $\alpha$  knockout mouse phenotypes, early activation of IRE1 $\alpha$  branch of UPR in MANF knockout mice and a high affinity for MANF to IRE1 $\alpha$  LD, as compared to PERK and ATF6 LDs, we decided to further focus on MANF-IRE1 $\alpha$  LD interaction. We tested the interaction between purified recombinant *CHO* produced MANF and IRE1 $\alpha$  LD using two other methods in addition to MST. In gel filtration chromatography the MANF-IRE1 $\alpha$  LD complex was co-purified and revealed that MANF interacts with the monomer of IRE1 $\alpha$  LD (Supplementary Fig. 1b). In binding on nickel coated plates followed by ELISA-based MANF detection we again confirmed that MANF binds to IRE1 $\alpha$  LD-His (Supplementary Fig. 1c).

### **BiP prevents MANF interaction with IRE1 $\alpha$ LD**

As shown above, both MANF and BiP were able to bind IRE1 $\alpha$  LD with similar affinities. Therefore, we hypothesised that BiP can prevent the interaction between MANF and IRE1 $\alpha$  LD if MANF and BiP compete for the same binding site on IRE1 $\alpha$  LD. Alternatively, MANF binding to BiP may increase the affinity of BiP interaction with IRE1 $\alpha$  allosterically, if they form a tripartite complex. To distinguish between these two hypotheses we tested the interaction between MANF and IRE1 $\alpha$  LD in presence of increasing concentrations of BiP (1nM-50nM) using MST. We found that 10nM BiP decreased the affinity of MANF binding to IRE1 $\alpha$  LD and 50nM BiP abolished the interaction (Fig. 1g). This result suggests that MANF and BiP compete for the same binding site on IRE1 $\alpha$  LD. To investigate whether BiP abolished the MANF-IRE1 $\alpha$  LD interaction due to MANF-BiP interaction, we tested purified recombinant human MANF mutant proteins MANF E153A and MANF R133E deficient in BiP binding (Yan et al., 2019; Eesmaa et al., under review) for binding to IRE1 $\alpha$  LD. We found that MANF E153A and MANF R133E were binding IRE1 $\alpha$  LD with similar affinities as wild-type MANF, confirming that binding sites for BiP and IRE1 $\alpha$  LD are different (Supplementary Fig. 1d). In addition, we also tested whether BiP affects the binding of MANF E153A and MANF R133E to IRE1 $\alpha$  LD and found that similarly to wild-type MANF 50nM BiP abolishes the interaction of BiP binding deficient MANF mutants with IRE1 $\alpha$  LD (Supplementary Fig. 1e). These results demonstrate that, BiP-MANF interaction does not affect BiP competition with MANF for IRE1 $\alpha$  LD binding. We conclude that BiP either competes with MANF for the same binding interfaces on the LD of IRE1 $\alpha$  or changes the conformation of the LD to being restrictive for MANF binding.

We then tested whether MANF can increase the affinity of BiP to IRE1 $\alpha$  LD. Interestingly, in the presence of increasing concentrations of MANF (10 nM-1  $\mu$ M) BiP was still able to interact with

IRE1 $\alpha$  LD (Supplementary Fig. 1f). At unphysiological 10  $\mu$ M concentrations of MANF the BiP-IRE1 $\alpha$  LD interaction was abolished (Fig. 1h). Based on these data we hypothesised that MANF can bind IRE1 $\alpha$  LD only when BiP is not bound to IRE1 $\alpha$ , as it happens in conditions of ER stress, when BiP dissociates from UPR sensors to bind misfolded or aggregated proteins. We favor the interpretation that BiP binding changes the conformation of IRE1 $\alpha$  LD so that it loses the high affinity binding site for MANF, because MANF is not displacing BiP from the complex with IRE1 $\alpha$  at the concentration equal to its  $K_d$  to IRE1 $\alpha$ .

### **Ca<sup>2+</sup> regulates MANF-IRE1 $\alpha$ LD interaction**

Considering that ER is crucial for the maintenance of cellular calcium homeostasis and Ca<sup>2+</sup> depletion from ER is known to activate UPR, we have tested whether Ca<sup>2+</sup> affects MANF interaction with UPR sensors. The concentration of free Ca<sup>2+</sup> in ER has been reported to be between low  $\mu$ M range to up to 1-3 mM, depending on the techniques used for measurements as well as cell types (Zampese & Pizzo, 2012). We started from testing of interactions between MANF and UPR sensors in the presence of 500  $\mu$ M Ca<sup>2+</sup>, since this concentration is most often reported as a physiologically relevant concentration of free Ca<sup>2+</sup> in ER in basal conditions. At 500  $\mu$ M Ca<sup>2+</sup> the affinity of MANF to IRE1 $\alpha$  LD was slightly decreased and no changes in the affinities of MANF to PERK and ATF6 LDs were found (Supplementary Fig. 1g, h, i). When MANF-IRE1 $\alpha$  LD interaction was further tested in presence of increasing concentrations of Ca<sup>2+</sup> (100 nM-2.5 mM), we found that the affinity of MANF to IRE1 $\alpha$  was inversely proportional to Ca<sup>2+</sup> concentration (Fig. 1i). Since Ca<sup>2+</sup> is depleted from the ER lumen upon ER stress (Mekahli et al., 2011), decrease in Ca<sup>2+</sup> concentration in the ER can facilitate MANF-IRE1 $\alpha$  interaction in ER-stressed, but not in naive cells.

### **C-terminal domain of MANF directly interacts with IRE1 $\alpha$ LD**

Since we have earlier found that 63 amino acid C-terminal domain of MANF (C-MANF) can protect neurons from chemically induced cell death as efficiently as full-length MANF (Hellman et al, 2011), we hypothesized that binding of MANF to IRE1 $\alpha$  may occur through C-MANF. We tested the interactions between chemically synthesized or *E.coli* produced C-MANF with luminal domains of human IRE1 $\alpha$ , PERK and ATF6 as it was done for full-length MANF. We showed that chemically synthesized C-MANF is interacting with all three UPR sensors with higher affinities as compared with full-length MANF: C-MANF-IRE1 $\alpha$  LD  $K_d=9.5\pm 4.2$  nM, C-MANF-PERK LD  $K_d=7.6\pm 3.1$  nM, C-MANF-ATF6  $K_d=9.8\pm 4.3$  nM (Fig. 2a, b, c). We also tested chemically synthesized C-MANF in a survival assay in SCG sympathetic neurons and found it biologically active, i.e. possessing the ability to promote survival SCG neurons in the absence of nerve growth factor (NGF) (Fig. 2d). We showed that chemically synthesized C-MANF is homogeneous using high-performance liquid chromatography (HPLC) and has the required disulfide bond between Cys128 and Cys130 using mass spectrometry (MS) (Supplementary Fig. 2a, b). We found that *E.coli* produced C-MANF is also interacting with all three UPR sensors, but the affinities were significantly lower as compared with full-length MANF and chemically synthesized C-MANF. As with full-length MANF, *E.coli* produced C-MANF also had the highest affinity to IRE1 $\alpha$  LD  $K_d=241.2\pm 107.5$  nM and lower affinities to PERK and ATF6 LDs,  $K_d=1.4\pm 0.6$   $\mu$ M and  $K_d=1.3\pm 0.7$   $\mu$ M, correspondingly (Supplementary Fig. 2c). These data confirm our finding that *E.coli* synthesized MANF and its variants generally have lower affinity for the LDs of UPR sensors and perhaps also other binding partners.

## **MANF interacts with the luminal domain of IRE1 $\alpha$ in cells**

To test whether the interaction between MANF and IRE1 $\alpha$  also occurs in cells, we performed *in situ* proximity ligation assay (PLA) in Flp-In-TREx293 and CHO cells. In the first set-up, we investigated the interaction between endogenous MANF and overexpressed IRE1 $\alpha$  with hemagglutinin tag (IRE1 $\alpha$ -HA) in isogenic stable cell lines, expressing BiP-HA (positive control), IRE1 $\alpha$ -HA, GFP-HA (negative control) upon doxycycline induction. We found that in Flp-In-TREx293 cells endogenous MANF interacts with IRE1 $\alpha$ -HA (Fig 3a, b). In addition, we tested MANF-IRE1 $\alpha$  interaction in CHO cells, in order to analyse the interaction between endogenous IRE1 $\alpha$  and overexpressed MANF-HA. We found that endogenous IRE1 $\alpha$  interacts with MANF-HA in CHO cells (Supplementary Fig. 3a)., MANF-HA construct was biologically active in a survival assay in SCG neurons (Eesmaa et al., under review). As an additional to GFP-HA negative control we used a cell line expressing truncated version of MANF, lacking a major part of the C-terminal domain (Supplementary Fig. 3b).

We further verified the interaction between MANF and IRE1 $\alpha$  LD in cells using bimolecular fluorescence complementation assay (BiFC). HEK293 cells were transfected with bait and prey proteins fused either to the N-terminal (NV) or C-terminal fragment of Venus, a variant of yellow fluorescent protein (YFP). If bait and prey proteins are interacting, the split Venus fragments reconstitute and form full-length fluorescent protein, enabling the detection of interaction using fluorescence microscopy. To ensure the correct cellular localization of tested proteins we designed the constructs with Venus fragments located between the signal sequences and mature proteins. As positive controls we used transcription factors Jun and Fos and known interactor of IRE1 $\alpha$  LD BiP. To check for the absence of non-specific background signal, we tested also the interaction between Jun and Max, two non-interacting transcription factors.

Using BiFC, we demonstrated that pre-NV-MANF is interacting with pre-CV-IRE1 $\alpha$  LD in HEK293 cells (Fig. 3c). Interestingly, we found that the interaction between MANF and IRE1 $\alpha$  LD in cells occurs through C-terminal domain of MANF (C-MANF). Moreover, N-terminal domain of MANF (N-MANF) was not interacting with IRE1 $\alpha$  LD (Fig. 3c). Since it is currently debatable which of the domains of BiP is interacting with IRE1 $\alpha$  LD, we tested the interaction of ATP-binding domain of BiP (BiP NBD) and substrate-binding domain of BiP (BiP SBD) with IRE1 $\alpha$  LD. According to our data BiP mainly interacts with IRE1 $\alpha$  LD through its NBD and for BiP SBD much weaker and less frequent signal was detected using BiFC (Supplementary Fig. 3c).

## **Dissection of IRE1 $\alpha$ LD binding site in MANF**

We confirmed the interaction between MANF and IRE1 $\alpha$  LD both for purified recombinant proteins and in cells using several techniques. We then set out to identify (predict) the exact binding sites between these proteins using known structures of MANF (PDB ID: 2KVD)/ C-MANF (PDB ID: 2KVE) and IRE1 $\alpha$  LD (PDB ID: 2HZ6) (Fig. 4a) and computational modelling, followed by MANF site-directed mutagenesis and testing of the IRE1 $\alpha$  LD binding and biological activity of the respective MANF mutants.

At first, molecular docking calculations were carried out for C-MANF in complex with IRE1 $\alpha$  LD without any mutual protein position constrains. The IRE1 $\alpha$  LD was considered acting as a receptor and MANF as a ligand and was docked flexibly. In result, 30 computationally generated protein-protein complex configurations (hereinafter referred as configurations) referring to different relative positions of MANF and IRE1 $\alpha$  LD were obtained. The analysis of these configurations showed that

IRE1 $\alpha$  LD is contacted primarily by the link between C- and N-terminal domains of MANF protein involving the M94 - T105 and by K150 - L158 regions (Supplementary Table 1, Complex configurations 1-30).

In order to estimate the importance of individual amino acid residues of MANF in the interaction with IRE1 $\alpha$  LD, the frequency of the appearance of each amino acid residue in 30 docking computational configurations was determined. Furthermore, the number of configurations involving hydrogen bonding at the complex interface was assessed for these individual MANF amino acid residues (Table 1).

The examination of the computational results led to the identification of three amino acids having the most frequent involvement in specific interactions, i.e. hydrogen bonds, the residues M94, K96 and R155 (Fig. 4b, c, d). The mutation at M94 is expected to have minor effect as it involves the hydrogen bond of the protein backbone. Nevertheless, all these three amino acids were proposed as targets for mutations.

The second series of molecular docking calculations was carried out with structural constraints at the MANF protein. Notably, MANF is a two-domain bifunctional protein (Parkash et al., 2009; Hellman et al., 2011) (Fig. 4a) and in principle its activity as a ligand for IRE1 $\alpha$  can be supported by interactions involving amino acid residues from either N-terminal or C-terminal domain, or both. The disulfide bridge containing cysteine loop (C127-K128-G129-C130) in the C-terminal domain of MANF has been suggested as the most attractive site for binding, since earlier in (Mätlik et al., 2015) it was shown to be crucial for the anti-apoptotic activity of MANF in sympathetic SCG neurons. The analysis of the 30 configurations of MANF with IRE1 $\alpha$  LD with the requirement of the involvement of the cysteine loop in the protein-protein binding was accordingly carried out as described above. Notably, only four configurations out of 30 featured significant interactions between the proteins. In this analysis, the frequency of appearance as binding residue in the configurations and the frequency of appearance in hydrogen bonds were hence calculated only for C127, K128, G129 and C130 amino acid residues of MANF (Table 2). The interactions between MANF and IRE1 $\alpha$  LD in all configurations regarding the required involvement of the cysteine loop are listed in Table S2 in the supplementary materials (Complex configurations 31-60). Because of the suggested importance in the protein-protein interactions, all four amino acids in the disulfide bridge containing loop were still included as targets for mutations (Fig. 4b, e, f).

In conclusion, the analysis of all computational results led to the identification of four potential binding regions in IRE1 $\alpha$  LD (Supplementary Fig. 4a). In the case of MANF, only one additional potential binding site apart from the cysteine loop was identified (Fig. 4b, Supplementary Fig. 4b). Notably, proposed IRE1 $\alpha$  LD binding regions in MANF are highly evolutionary conserved (Supplementary Fig. 4c).

### **Expression of MANF mutants putatively deficient for IRE1 $\alpha$ binding**

Following the structural predictions of MANF-IRE1 $\alpha$  LD interactions from the computational modelling we generated MANF mutants, putatively deficient in IRE1 $\alpha$  LD binding. The cysteine and lysine/cysteine in cysteine loop were mutated to serine and alanine/serine, correspondently (C130S and K128A C130S), the lysine in linker region between N- and C-terminal domains and arginine in RTDL-sequence were mutated to alanines (K96A and R155A). The levels of expression and secretion of generated mutant constructs were determined in CHO cells and were similar to that of the wild type MANF construct (wtMANF) (Supplementary Fig. 5a).

We also investigated the cellular localization of MANF mutants using immunocytochemistry and microinjections of plasmids encoding MANF mutants in mouse SCG neurons. No changes in the localization of MANF mutants compared to wtMANF were observed (Supplementary Fig. 5b, c).

### **MANF reduces IRE1 $\alpha$ oligomerization upon ER stress**

Upon the loading of ER with misfolded proteins dissociation of BiP from luminal domain of IRE1 $\alpha$  is thought to be the trigger of IRE1 $\alpha$  dimerization, phosphorylation and activation (Preissler and Ron, 2018). Also binding of unfolded proteins can trigger IRE1 $\alpha$  oligomerization and activation (Karagöz et al., 2017).

Since luminal domain of IRE1 $\alpha$  interacting with BiP and misfolded proteins clearly determines its oligomeric status and activation, and MANF binds to IRE1 $\alpha$  LD with high affinity, we decided to assess the effect of MANF on the oligomerization of IRE1 $\alpha$ . For this, we have generated and used a doxycycline inducible stable Flp-In TReX-293 cell line expressing GFP-tagged IRE1 $\alpha$  (Li et al., 2010) (Supplementary Fig. 6a). Upon the treatment with ER stressor, we can monitor and quantify the level of IRE1 $\alpha$  oligomerization, by measuring the number of IRE1 $\alpha$ -GFP foci per cell. We found that transient 48-hour overexpression of MANF decreased the number of IRE1 $\alpha$ -GFP foci per cell upon the treatment with the inhibitor of N-linked glycosylation and protein folding ER stressor tunicamycin (TM) (Fig. 5a). Expression of empty vector had no effect on IRE1 $\alpha$  oligomerization and served as a negative control.

We further tested MANF effect on IRE1 $\alpha$  oligomerization using MST and purified MANF and IRE1 $\alpha$  LD proteins. We tested the interaction of unlabeled titrated IRE1 $\alpha$  LD with fluorescently labeled IRE1 $\alpha$  LD and showed that IRE1 $\alpha$  LD is interacting with labeled IRE1 $\alpha$  LD with extremely high affinity  $K_d=2.7\pm 1.6$ nM (Fig. 5b). We further analysed whether MANF at different concentrations (10nM-5 $\mu$ M) affects IRE1 $\alpha$  LD binding to labeled IRE1 $\alpha$  LD, and found that in presence of 100nM MANF the affinity of IRE1 $\alpha$  LD to IRE1 $\alpha$  LD binding drops to  $K_d=40\pm 29$ nM and in presence of 1 $\mu$ M and 5 $\mu$ M of MANF interaction IRE1 $\alpha$  LD- IRE1 $\alpha$  LD is abolished (Fig. 5b). This finding confirmed the ability of MANF to decrease IRE1 $\alpha$  oligomerization.

### **MANF mutant deficient for IRE1 $\alpha$ binding does not affect IRE1 $\alpha$ oligomerization**

To test whether MANF mutants putatively deficient for IRE1 $\alpha$  binding have a similar effect on the oligomerization status of IRE1 $\alpha$ , we performed transient 48-hour overexpression of MANF mutants in the same way as we did for wtMANF. Two MANF mutants MANF K96A and MANF R155A did not affect the level of oligomerization of IRE1 $\alpha$  (Fig. 5c). MANF cysteine loop mutants MANF C130S and MANF K128A C130S decreased IRE1 $\alpha$  oligomerization similarly to wtMANF, suggesting that cysteine loop of MANF is not involved in MANF binding to IRE1 $\alpha$ .

We expressed and purified recombinant proteins of putatively deficient for IRE1 $\alpha$  binding MANF mutants MANF K96A and MANF K128AC130S in CHO cells (Supplementary Fig. 5d). MANF K96A was chosen due to more pronounced difference from wtMANF in IRE1 $\alpha$  oligomerization assay as compared with other mutants and MANF K128A C130S was chosen to test also the mutant from other putative binding region predicted by computation modeling. We tested the interactions of purified MANF mutant proteins with fluorescently labeled IRE1 $\alpha$  LD using MST. We found that MANF K96A was not interacting with IRE1 $\alpha$  LD, while the affinity of MANF K128A C130S to



IRE1 $\alpha$  LD was not compromised, it was interacting with IRE1 $\alpha$  LD with the similar affinity to that of wtMANF with  $K_d=55\pm 35$  nM (Fig. 5e). We then decided to test, whether MANF K96A is affecting IRE1 $\alpha$  dimerization similarly to wtMANF using MST. We tested the interaction of unlabeled titrated IRE1 $\alpha$  LD with fluorescently labeled IRE1 $\alpha$  LD in presence of 1 $\mu$ M MANF K96A and found that in presence of MANF mutant IRE1 $\alpha$  LD is still binding IRE1 $\alpha$  LD  $K_d=7.3\pm 4.2$ nM (Fig. 5f). This finding suggests that the direct binding of MANF to IRE1 $\alpha$  LD is required for the MANF ability to decrease IRE1 $\alpha$  oligomerization.

### **MANF is reducing IRE1 $\alpha$ phosphorylation upon ER stress**

Since MANF decreased IRE1 $\alpha$ -oligomerization, we tested the effect of MANF on IRE1 $\alpha$  phosphorylation upon ER stress. Phosphorylation of Ser724 in activation loop of IRE1 $\alpha$  is believed to be crucial for the activation of IRE1 $\alpha$  and triggering of XBP1 splicing (Prischi et al., 2014). We assessed the level of pSer724-IRE1 $\alpha$  upon tunicamycin-induced ER stress in transfected/transduced with MANF or MANF K96A HEK293 cells and IRE1 $\alpha$  knockout mouse embryonic fibroblasts reconstituted with IRE1 $\alpha$ -HA. We showed that in HEK293 cells MANF transfection decreased pSer724 IRE1 $\alpha$  after 240 minute-ER stress (Fig. 6x). MANF treatment of IRE1 $\alpha$  knockout mouse embryonic fibroblasts reconstituted with IRE1 $\alpha$ -HA also reduced pSer724-IRE1 $\alpha$  upon 240 minute-(TM)-induced ER stress and 24-hour amino acid starvation (Fig. 6a, b).

### **MANF-IRE1 $\alpha$ interaction is crucial for the survival of mouse sympathetic in ER stress**

MANF, both overexpressed from plasmid or microinjected as a protein have been already shown to be protective against topoisomerase II inhibitor etoposide, protein kinase inhibitor staurosporine- and nerve growth factor (NGF) deprivation-induced apoptosis in mouse sympathetic SCG neurons (Hellman et al., 2011, Mätlik et al., 2015). Recently, we have also showed that MANF rescues sympathetic neurons from TM-induced apoptosis (Eesmaa et al., under review). Microinjection of wtMANF construct significantly increased the survival of TM-treated SCG neurons: by 35% as compared to empty vector (Fig. 6c). These findings are further supported by our recent study, where IRE1 $\alpha$  kinase inhibitor KIRA6 and IRE1 $\alpha$  RNase inhibitor 4 $\mu$ 8C abolish the prosurvival effect of MANF on dopamine neurons and sympathetic SCG neurons *in vitro* (Eesmaa et al., under review)

To test whether MANF mutants have similar to wtMANF anti-apoptotic activity, we tested them, first, by microinjecting the respective expression plasmids or mutant proteins into mouse SCG neurons. We found that the mutation at Lys96 (MANF K96A) resulted in the abolishment of pro-survival activity of MANF, double mutant of Lys96 and Arg155 (MANF K96A R155A) was not biologically active either (Fig. 6c). Interestingly, Arg155 mutant (MANF R155A) and both cysteine loop mutants (MANF C130S and MANF K128A C130S) were protecting mouse SCG neurons from TM-induced apoptosis as efficiently as wtMANF.

We then tested the IRE1 $\alpha$  LD binding deficient MANF K96A and IRE1 $\alpha$  LD-binding MANF K128A C130S mutants by microinjecting the respective mutant proteins to neurons in mouse SCG-neuron survival assay. We found that mutant MANF K96A protein was not able to protect SCG-neurons from TM-induced apoptosis, while the other mutant protein MANF K128A C130S exhibited the same anti-apoptotic activity as wtMANF (Fig. 6d). This result confirms that in SCG-neurons MANF exerts its cytoprotective effect against ER stress through the direct interaction with IRE1 $\alpha$ .

Before performing *in vivo* experiment we tested the ability of IRE1 $\alpha$  binding-deficient MANF K96A to support the survival of dopamine neurons in culture upon ER stress induced with SERCA-pump inhibitor thapsigargin (TG). We showed that MANF K96A was not able to protect dopamine neurons from TG-induced apoptosis (Fig. 6e).

### **MANF mutant unable to bind to IRE1 $\alpha$ cannot improve motor behavior in rat 6-OHDA model of Parkinson's disease *in vivo***

To test whether MANF-IRE1 $\alpha$  interaction is important for the neurorestorative activity of MANF *in vivo*, we went on to investigate the effects of wtMANF and MANF K96A mutant proteins in rat 6-OHDA model of Parkinson's disease (PD), described previously (Lindholm et al., 2007; Voutilainen et al., 2009). Since wtMANF was demonstrated to restore motor behavior after lesioning *in vivo* through the protection of tyrosine hydroxylase (TH)-positive cells in the substantia nigra pars compacta (SNpc), we investigated in current study the behavioral effect of deficient for IRE1 $\alpha$ -binding MANF K96A.

The animals were injected with wtMANF, MANF K96A or vehicle intrastrially two weeks after 6-OHDA lesioning (Supplementary Fig. 7b). Single intrastriatal wtMANF injection reduced ipsilateral turning behavior as compared to vehicle-treated rats with maximal effect at 12 weeks after lesioning (Fig. 7a). MANF K96A injection had no effect on the rotational behavior, confirming that MANF-IRE1 $\alpha$  interaction is crucial for restoring motor behavior in the animal model of PD.

### **Discussion**

Inositol-requiring enzyme 1 $\alpha$  (IRE1 $\alpha$ ) is the most evolutionary conserved and well studied UPR sensor. However, the mechanisms of its activation and regulation still remain poorly understood. According to classical view the activation of IRE1 $\alpha$  and two other UPR sensors, PERK and ATF6 is triggered by the dissociation of major ER chaperone BiP from their luminal domains (Walter and Ron, 2011). Recently the activation of IRE1 $\alpha$  has been shown to be triggered by misfolded proteins (Karagöz et al., 2017) and the chaperone Hsp47 (Sepulveda et al., 2018), while protein disulfide isomerase A6 (PDIA6) has been shown to inhibit IRE1 $\alpha$  after BiP dissociation from IRE1 $\alpha$  LD (Eletto et al., 2014). Similarly to IRE1 $\alpha$ , PERK can be also activated by misfolded proteins and other chaperone protein disulfide isomerase A1 (PDIA1) (Wang et al., 2018; Kranz et al., 2017). Due to the physiological importance in keeping cells alive by maintaining cell survival under stress conditions most likely the regulation of IRE1 $\alpha$  activation as well as its inhibition under chronic ER stress are complex processes, involving not only BiP, but also other proteins.

Here we show MANF as a major IRE1 $\alpha$  interactor and regulator-inhibitor of its activation in ER stress conditions. To date MANF has been shown to alleviate ER stress in various *in vitro* and *in vivo* models (Mizobuchi et al., 2007; Apostolou et al., 2008; Tadimalla et al., 2008; Hellmann et al., 2011; Lindahl et al., 2014; Voutilainen et al., 2017; Danilova et al., 2019; Pakarinen et al. 2020), but the exact mechanism underlying its cytoprotective effects had not been shown before. After MANF has been found to be involved in modulation of innate immunity, the number of studies on MANF dramatically increased (Neves et al., 2016). Despite the growing interest in MANF, only a few papers addressed the mechanism of its action. Binding of MANF to lipid sulfatide has been shown to be promoting cellular uptake of MANF and cytoprotection against hypoxia-induced cell death (Bai et al., 2018). MANF was shown to inhibit nucleotide exchange processes of BiP and prolong the interaction of BiP with misfolded proteins, thereby regulating protein-folding homeostasis (Yan et al., 2019). Our data

are not contradicting these studies but rather giving an additional novel understanding of MANF mechanism of action in ER.

The data we present here help to understand why MANF is acting only on ER stressed or injured cells. In the normally functioning cells the major ER chaperone BiP binds with high affinity to luminal domains of IRE1 $\alpha$ , PERK and ATF6 and keeps them silent. In ER stress, aggregated or misfolded proteins bind to BiP which is then dissociated from UPR sensors rendering their activation. We show here that MANF binds to LDs of IRE1 $\alpha$ , PERK and ATF6 LDs. What is more MANF binds to the same site of IRE1 $\alpha$  LD as BiP and therefore MANF binding to IRE1 $\alpha$  and possibly to other sensors is possible only, if BiP is dissociated. This means that MANF can bind and regulate IRE1 $\alpha$ , and possibly PERK and ATF6 only in highly stressed cells when BiP is dissociated. This also explains, why MANF is not acting on naive healthy cells, because in these cells the MANF binding site in IRE1 $\alpha$  LD is occupied and MANF binding is blocked by BiP. According to our results, BiP affinity to IRE1 $\alpha$  LD is the lowest and MANF affinity to IRE1 $\alpha$  LD is the highest, as compared to the affinities to PERK and ATF6 LDs. These results imply that, in conditions of ER stress BiP dissociates first from IRE1 $\alpha$  and thus MANF binds first to IRE1 $\alpha$  and only then to PERK and ATF6. MANF-IRE1 $\alpha$  binding may therefore be more physiologically significant than binding to other UPR sensors. That is why we focused on IRE1 $\alpha$ -MANF interaction; as a continuation of this work the role of interaction of MANF with PERK/ATF6 will be further investigated. Notably, the affinities for mammalian cell produced proteins were higher than for bacterial ones both for BiP and MANF interactions with LDs of UPR sensors likely due to the fact that bacterial cell produced proteins may lack disulfide bonds.

Computational modelling using known 3D structures of MANF, C-MANF and IRE1 $\alpha$  LD allowed us to dissect the IRE1 $\alpha$  binding site in MANF. We have shown that Lys96 in MANF is involved in the binding with IRE1 $\alpha$  and when mutated to alanine, results in abolishment of the effect of MANF on oligomerization of IRE1 $\alpha$ , anti-apoptotic activity of MANF in mouse SCG neurons and dopamine neurons and neurorestorative activity of MANF *in vivo* in 6-OHDA model of PD. Lys96 is located in the linker (hinge) region before C-terminal domain of MANF, meaning that more likely the interaction between MANF and IRE1 $\alpha$  LD involves in addition to C-MANF also hinge region. In line with that, according to our BIFC data only C-MANF, containing this part of linker region, but not N-MANF was interacting with IRE1 $\alpha$ , confirming that more crucial for interaction are amino acids located in the linker region and in the C-terminal domain of MANF. In MST experiments C-MANF showed high affinity to IRE1 $\alpha$  LD confirming that binding occurs through C-terminal domain of MANF and hinge region. It suggests that while Lys96 is clearly important for the anti-apoptotic activity of MANF, other amino acids in the C-terminal MANF also play a role in MANF-IRE1 $\alpha$  interaction. Further computational studies of the possible structure of MANF-IRE1 $\alpha$ /PERK/ATF6 complexes using full-length structure of MANF are of high importance and can help to understand the possible mechanism of interaction of MANF with UPR sensors.

A previous study by Mätlik et al., 2015 showed that cysteine loop mutant MANF C151S (C130S) is not able to rescue ER stressed sensory neurons *in vitro* or in an animal model of stroke. MANF  $\Delta$ RTDL had a significantly reduced survival effect for sympathetic SCG neurons whereas it was fully active in sensory neurons treated with etoposide. In our systems, we show that MANF C130S reduced IRE1 $\alpha$  oligomerization similarly to wtMANF and did not compromise the survival effect of MANF *in vitro*. Thus, the mode of MANF- IRE1 $\alpha$  interaction, cell type, intensity of stress and type of cellular stressor may differently affect life and death decisions through IRE1 $\alpha$ .

We also demonstrated that MANF decreases IRE1 $\alpha$  oligomerization, perhaps due to MANF binding to IRE1 $\alpha$  close to the dimerization site of IRE1 $\alpha$ . It has been shown before that during ER stress progression MANF expression levels increase and the fraction of IRE1 $\alpha$ -bound BiP decreases (Apostolou et al., 2008; Bertolotti et al., 2000). This facilitates MANF binding to IRE1 $\alpha$ , which in turn regulates the intensity of IRE1 $\alpha$ -mediated UPR response by decreasing or preventing IRE1 $\alpha$ -hyperoligomerization, resulting in decreased IRE1 $\alpha$  phosphorylation, decreased sXBP1 and decreased apoptosis.

IRE1 $\alpha$  can be autophosphorylated at multiple sites (Prischi et al., 2014), and it is not fully clear how phosphorylation at specific phosphorylation sites affects IRE1 $\alpha$  activation and downstream signaling. Interestingly, mutation of all three serines in the activation loop of IRE1 $\alpha$  does not fully abolish splicing of XBP1, confirming that endoribonuclease activity is not fully dependent on kinase activity of IRE1 $\alpha$  or there are other important phosphorylation sites or soluble kinases or phosphatases involved in the regulation of IRE1 $\alpha$  activation. In line with this tyrosine kinase c-Abl was shown to increase IRE1 $\alpha$  phosphorylation and endoribonuclease activity in chronic ER stress, leading to apoptosis (Morita et al., 2017). MANF is decreasing IRE1 $\alpha$  phosphorylation at Ser724 most likely through stabilizing of monomeric conformation of IRE1 $\alpha$  and thereby prevention of IRE1 $\alpha$  dimerization and autophosphorylation. Alternatively, MANF binding can stabilize IRE1 $\alpha$  in conformation favoring the recruitment of soluble kinase or phosphatase affecting IRE1 $\alpha$  phosphorylation at Ser724 and possibly at other phosphorylation sites.

Spliced X-box-binding protein 1 (sXBP1) is generally linked to activation of prosurvival mechanisms and restoration of homeostasis upon ER stress (Lee et al., 2003). However, in some cases high level of sXBP1 was reported to result in negative consequences. It was shown to facilitate release of pro-inflammatory extracellular vesicles upon lipotoxic ER stress in hepatocytes (Kakazu et al., 2016). In lipopolysaccharide-induced ER stress *in vivo* sXBP1 was shown to induce acetyltransferase P300 and impair insulin signaling (Cao et al., 2017). We showed that MANF downregulates sXBP1 in HEK293 cells in this study and in dopamine neurons (Eesmaa et al., under review). However, we favor the hypothesis that anti-apoptotic action of MANF is realized not through the downregulation of sXBP1, but rather through prevention of activation of pro-apoptotic pathways, known to be triggered by hyperactivated IRE1 $\alpha$ .

Upon chronic severe unresolved ER stress hyperactivated and hyperoligomerized IRE1 $\alpha$  is known to recruit TRAF2 and ASK1 and trigger JNK/MAPK-mediated apoptosis and transcription of pro-inflammatory genes (Nishitoh et al., 2002, Brozzi & Eizirik, 2016). IRE1 $\alpha$ -hyperoligomerization has been also shown to upregulate thioredoxin interacting protein (TXNIP), activating NLRP3 inflammasome and promoting apoptosis (Morita et al., 2017). Prosurvival action of MANF through prevention of IRE1 $\alpha$  hyperoligomerization can be also due to the inhibition of canonical NF- $\kappa$ B pathway shown to be triggered by IRE1 $\alpha$  activation through the degradation of I $\kappa$ B by IRE1 $\alpha$  upon ER stress (Kaneko et al., 2003; Hu et al., 2006). In line with this MANF has been shown to reduce NF- $\kappa$ B pathway activation in beta cells (Hakonen et al., 2018) and in HEK293T cells (Chen et al., 2015).

Based on our findings and previous studies on IRE1 $\alpha$ -phosphorylation-hyperoligomerization we propose the following putative mechanism of MANF signaling through IRE1 $\alpha$  (Fig. 8). We suggest that MANF represents a ‘second wave’ of UPR regulation-inhibition, following BiP dissociation from

IRE1 $\alpha$ . MANF via its C-terminal domain and linker region is binding IRE1 $\alpha$  close to its dimerization surface and prevents IRE1 $\alpha$  dimerization-oligomerization and hyperactivation upon chronic ER stress. That leads to decrease in phosphorylation of IRE1 $\alpha$ , reduced sXBP1 formation and prevents triggering of IRE1 $\alpha$  hyperactivation-induced pro-apoptotic mechanisms and therefore increases cell survival. In chronic ER stress MANF eventually also binds to PERK and ATF6 and through these interactions can regulate them as well. In MANF KO mice first IRE1 $\alpha$ , but later all three UPR pathways are activated. We showed earlier that MANF can also attenuate the downstream signalling of PERK and ATF6 pathways (Eesmaa et al., under review) and, perhaps, the specificity of attenuation of UPR sensors is determined by order and degree of BiP dissociation from UPR sensors, correlating with the severity of ER stress. MANF might be also involved in the crosstalk between UPR sensors.

Our results are important for the development of new strategies to treat different neurodegenerative and UPR associated diseases, such as diabetes. Specific inhibitor of IRE1 $\alpha$  signaling KIRA8, have already shown to have anti-diabetic effect (Ghosh et al., 2014; Morita et al., 2017). Another attenuator of IRE1 $\alpha$  signaling c-Abl inhibitor Imatinib (Gleevec) was shown to restore cognitive function and have neuroprotective potential in LPS-induced inflammatory mouse model (Weintraub et al., 2013) and also reduces brain injury after traumatic brain injury (Su et al., 2015). Considering that according to our results MANF can act similarly, but interacts with all three UPR sensors (IRE1 $\alpha$ , PERK, ATF6), MANF can be much more potent as neuroprotective and anti-diabetic agent. In future *in vitro* screening of small-molecule compounds, mimicking MANF action on IRE1 $\alpha$  and other UPR sensors can lead to the development of new drugs.

## Materials and Methods

### Cell lines

HEK293 cells for bimolecular fluorescence complementation assay (BiFC) experiments were grown in Dulbecco's modified Eagle's medium DMEM supplemented with 10% fetal bovine serum and 50ug/ml normocin (ant-nr-2, Invivogen). HEK293 cells and other cell lines used were grown at 37°C and 5% CO<sub>2</sub>.

Flp-In<sup>TM</sup> T-REx<sup>TM</sup> 293 cell line (Invitrogen) containing a single stably integrated FRT site and expressing Tet repressor were used for generation of inducible cell lines, expressing IRE1 $\alpha$ -HA, BiP-HA or GFP-HA. The medium composition was the same as for HEK293 cells.

Flp-In<sup>TM</sup>-CHO cells (R75807, Thermo Fisher Scientific) were grown in growth media consisting of Ham's F12 nutrient mix (21765029, Thermo Fisher Scientific), 10% FBS (10270106, Gibco), 2mM GlutaMAX (35050061, Thermo Fisher Scientific) and normocin (ant-nr-2, Invivogen). We used the Flp-In<sup>TM</sup>-CHO to generate CHO-derived stable transgenic cell lines overexpressing either MANF or its mutants from a transcriptionally active locus. For this, the respective pcDNA5/FRT/TO pre-SH-MANF<sup>wt</sup> or mutant constructs were cotransfected with the Flp-recombinase expressing pOG44 plasmid in a 1:9 ration using JetPEI (101-10N, Polyplus Transfections) transfection reagent. The selection was started 48 hours after transfection using growth media supplemented with 500 $\mu$ g/ml Hygromycin Gold (ant-hg-1, Invivogen). Selection media was changed every 3-4 days until confluent colonies of stable transgenic cells had formed and cells were ready to be split.

Mouse embryonic fibroblasts (MEFs) cells were grown in Dulbecco's modified Eagle's medium DMEM (12-614F, Lonza), supplemented with 5% fetal bovine serum and non-essential amino acids at 37°C and 5% CO<sub>2</sub>.

### Reagents and proteins

The inducers of ER stress thapsigargin (T7459, ThermoFisher Scientific) and tunicamycin (ab120296, Abcam) and IRE1 $\alpha$  inhibitors KIRA6 (HY-19708, MedChemExpress) and 4 $\mu$ 8C (14003-96-4, Cayman Chemical) were used.

Luminal domains (LD) of three UPR sensors, human IRE1 $\alpha$ , PERK and ATF6 and human MANF were expressed and purified in *CHO* cells by Icosagen Ltd (Tartu, Estonia). Human C-MANF was expressed and purified from *E.coli* cells (Hellmann et al., 2011) or synthesized chemically by Apeptide Ltd (Shanghai, China). Human recombinant GRP78 (BiP) (SMB-SPR-119A, StressMarq Biosciences Inc.) was used.

### Microscale thermophoresis (MST)

The experiments have been performed using Monolith NT.115 instrument (NanoTemper Technologies GmbH, Germany). Recombinant proteins were labeled through His-tag using Monolith His-Tag Labeling Kit RED-tris-NTA (MO-L008). The concentration of labelled proteins (targets) was 20nM for all the experiments and different starting concentrations of the ligands have been used. Experiments were performed in a buffer containing 10mM Na-phosphate buffer, pH 7.4, 1mM MgCl<sub>2</sub>, 3mM KCl, 150mM NaCl, 0.05% Tween-20. The measurements were done in premium coated capillaries (NanoTemper Technologies GmbH, MO-K025) using red LED source, power set at 100% and medium MST power at 25°C. Each data point represents mean  $\Delta F_{norm}$  values from n=2-4 independent experiments per binding pair  $\pm$ S.D, K<sub>d</sub> values $\pm$ error estimations are indicated. Data analysis was performed using MO.Affinity Analysis v2.3 and GraphPad Prism 7 software.

**Binding assay on nickel-coated plates** Nickel-coated plates (15442, Pierce) were blocked with 1% Casein PBS-T for 1 hour at RT on shaker, Bip-His+MANF (positive control), IRE1 $\alpha$  LD-His+MANF and GFR $\alpha$ 1-His+MANF (negative control) 1:1 mixtures were prepared in the buffer, that was used for microscale thermophoresis experiments. MANF+buffer mixture (1:1) was included to measure the background absorbance. The protein mixtures were vortexed and incubated at RT for 1 hour. After the incubation protein solutions were pipetted on the plates and incubated on the plates for 1 hour at RT. The plates were washed 3 times with 0.05% Tween-20 (P2287, Sigma-Aldrich) in PBS. After washing the detecting antibody HRP-linked mouse anti-human MANF, clone 4E12 (Icosagen) in blocking buffer was added and the plates were incubated overnight at +4°C on shaker. Next day the plates were washed 3 times and the color development was performed using Duoset ELISA Development System (DY999, R&D Systems) according to the manufacturer's instructions. The absorbance at 450 and 540nm was measured using plate reader (VICTOR3, Perkin Elmer). The background absorbance was subtracted. Data analysis was performed using GraphPad Prism 7 software

### Analysis of purity and glycosylation of luminal domains of UPR sensors

For analysis of protein N-glycosylation PNGase F (P0704S, New England Biolabs) was used and the assay was performed according to the manufacturer's instructions. Glycosylated protein (5 $\mu$ g/well) versus deglycosylated protein was loaded onto mini-PROTEAN precast gels (456-1093, Bio-Rad) and run at 40mA for 1 hour. Coomassie Brilliant Blue G-250 staining was performed according to the standard protocol. Glycosylated mammalian cell produced GDNF protein was used as a positive control.

### **Size exclusion chromatography (SEC)**

For complex preparation, purified human *CHO* expressed MANF and IRE-1 LD were combined in a molar ratio of 1.25:1 (MANF:IRE1 LD) at a total protein concentration of 0.7 mg/ml in size exclusion chromatography buffer (10 mM MES-NaOH pH 5.5, 150 mM NaCl, 3 mM KCl, 1 mM MgCl<sub>2</sub>, 0.05% TWEEN-20). The complex was incubated for 10 min at 22°C before size exclusion chromatography using a Superdex 200 Increase 3.2/300 column (GE Healthcare) at 22°C. Individual components were also run similarly. Selected fractions were analysed by Western blotting.

### **Protein – protein docking**

The X-ray diffraction crystal structure of the human IRE1-alpha luminal domain (IRE1 $\alpha$ , PDB ID: 2HZ6) with resolution 3.1 Å (Zhou et al., 2006) and the structure with the least restraint violations from the NMR solution structure of the C-terminal domain of mesencephalic astrocyte-derived neurotrophic factor (MANF, PDB ID: 2KVE) (Hellman et al., 2011) were used for protein–protein docking. The binding poses of the IRE1 $\alpha$  - MANF complexes were predicted by docking calculations using Schrödinger LLC BioLuminate software (Schrödinger 2018a, Schrödinger 2018b, etc.). Before molecular docking, the 3D structure of protein molecules was optimized using the Protein Preparation Wizard (OPLS\_2005 force field) in the Schrödinger LLC Maestro software (Schrödinger 2018a, Schrödinger 2018b, etc.). The protein–protein docking was carried out using PIPER procedure, which proceeds with a rigid body global search based on the Fast Fourier Transform (FFT) correlation approach (Kozakov et al., 2006). The PIPER procedure performs exhaustive evaluation of an energy function in discretized 6D space of mutual orientations of two proteins. The structures corresponding to different mutual orientations of the proteins were ordered according to the scoring function that is given as the sum of terms representing shape complementarity, electrostatic, and desolvation contributions. The top 1000 structures were subsequently clustered using the pairwise root mean square deviation (RMSD) as the distance measure between two proteins in the complex within a fixed clustering radius 9 Å (Kozakov et al., 2005). The selected structures from 30 largest clusters were refined by a SDU (Semi-Definite programming based Underestimation) medium-range optimization method (Paschalidis et al, 2007). The analysis of the protein–protein interactions of the final 30 top configurations was performed by using AutoDock Tools software (Morris et al., 2009).

### **Generation of MANF mutant plasmids and recombinant proteins**

pcDNA5/FRT/TO pre-SH-MANF K96A, C130S and R155A mutants were generated using site-directed inverse PCR mutagenesis and pcDNA5/FRT/TO pre-SH-MANF as template. The pcDNA5/FRT/TO pre-SH-MANF K128A C130S mutant was generated using pcDNA5/FRT/TO pre-SH-MANF C130S as template.

Recombinant human MANF protein was produced from a CHO-derived cell line using the QMCF technology as has been described before (P-101-100, Icosagen). The MANF K96A and K128A

C130S mutant recombinant proteins were produced by Icosagen using the same technology. Briefly, codon-optimized cDNAs were cloned to pQMCF-T expression vectors which were then transiently transfected to CHO-derived protein production cell line. Proteins were captured and purified from the cell culture media using 5ml Q FF followed by 1ml SP HP, buffer was exchanged into PBS pH 7.4 by size exclusion chromatography. Protein purity was verified by SDS-PAGE with Coomassie staining and immunoblotting using rabbit anti-MANF antibody (310-100, Icosagen).

### **Expression and secretion of MANF mutant plasmids**

CHO cells grown on 6cm plates transfected with pTO expression plasmids. Plasmid DNA (6ug) +12ul of Turbofect per plate. Media changed 24h after transfection to serum-free media (3ml per 6cm plate). Incubated for 24h more before harvesting cells and collecting media. Each cell pellet was lysed in 400ul of lysis buffer, 100ul of media was set aside before concentrating, and the rest was concentrated from ~ 3ml to ~ 100ul using Amicon Ultra-4 centrifugal filters 10K. 20ul of each sample was loaded onto 4-15% gel. Primary ab: m@HA (Abcam) 1:1000 2h. Secondary ab: g@mouse 690 LR (Licor) 1:10000

### **Duolink proximity ligation assay (PLA)**

The experiments were performed in 96-well format on Flp-in-TREx293 cells, expressing IRE1-HA/BiP-HA/GFP-HA upon doxycycline induction or on CHO cells, stably expressing HA-tagged MANF. 10000 cells per well was plated on pre-coated with Poly-D-Lysine (0.1mg/ml) black Perkin Elmer plates. Cells were fixed with 4% paraformaldehyde for 15 min and afterwards permeabilized/stained with DAPI (D9542, Sigma-Aldrich) in 1xPBS containing 0.05% Triton X-100 for 10 min. Blocking and incubation with antibodies have been performed following Duolink manufacturer's protocol. Cells were incubated overnight at +4°C with the following primary antibodies: anti-MANF rabbit pAb (Icosagen, 310-100), anti-IRE1 $\alpha$  rabbit mAb (CST, 3294), anti-BiP rabbit mAb (CST, 3177), anti-HA mouse mAb (Abcam, ab130275). Incubation with PLUS and MINUS PLA probes have been performed for 1 hour at +37°C. Ligation and amplification was performed according to manufacturer's instructions. The imaging of 16x sites/well was performed in TexasRed and DAPI channels using MolecularDevices Nano scanner. The analysis and quantification was done using CellProfiler 3.1.5 and CellProfiler Analyst 2.2.1 software.

### **Plasmids for BiFC**

pCE-BiFC-VC155 (CV) and pCE-BiFC-VN173 (NV) were a gift from Chang-Deng Hu (Addgene plasmids #22020 and #22019). pEZYflag and pEZYmyc-His were a gift from Yu-Zhu Zhang (Addgene plasmids #18700 and #18701). Gateway destination vectors for BiFC for N- and C-terminal tagging with Venus fluorescent protein fragments (pEZY BiFC N NV, pEZY BiFC N CV, pEZY BiFC C NV and pEZY BiFC C CV) were generated by PCR by replacing the flag or myc-His sequences from pEZYflag or pEZYmyc-His with VC155 or VN173 sequences from the respective plasmids.

To generate the MANF Gateway compatible entry vector, pCR3.1 MANF (Hellman et. al., 2010) was used to clone the MANF coding region into pENTR221 vector using Gateway entry clone generation by PCR, following the manufacturer's instructions (Invitrogen, Thermo Fisher Scientific, USA).



The following Gateway entry clones were from the Genome Biology Unit (GBU) Core Facility (Research Programs Unit, Faculty of Medicine, HiLIFE, University of Helsinki, Biocenter Finland): HSPA5 (Grp78) without stop (DQ895368), JUN without stop (DQ896432), FOS without stop (DQ893444), MAX without stop (JF432558). Shown is the Genbank accession number and the presence or absence of a translation stop-codon to indicate subsequent N- or C-terminal fusion, respectively, with a Venus fragment. The corresponding BiFC expression plasmids were made by LR clonase recombination reaction of pENTR221 constructs into the respective pEZY BiFC destination vector. pDONR223-ERN1 (IRE1) was a gift from William Hahn & David Root (Addgene plasmid # 23491). A stop codon at the end of the IRE1-coding reading frame was added before using that construct to generate a pDONR223 pre-CV-IRE1. For that purpose, inverse PCR was used to linearize the pDONR223 IRE1 with stop construct between the sequences corresponding to the pre-sequence and the mature IRE1. A C-Venus insert with a GS-linker was amplified from a pEZY BiFC pre-CV containing construct and used in a ligation reaction with the linearized pDONR223 IRE1 stop construct to generate pDONR223 pre-CV-IRE1. The latter was then used as an entry clone in an LR reaction to recombine the pre-CV-IRE1 sequence into the pEZY BiFC myc-His destination vector.

pEZY BiFC Grp78 NBD-NV and Grp78 SBD-NV were made using Grp78 NBD and SBD specific primers, inverse PCR and pEZY BiFC Grp78-NV as a template.

pENTR221 pre-N-Venus MANF was generated by amplifying the sequence corresponding to VN173 from the respective BiFC destination vectors and inserting it between the sequences coding for signal peptide (pre) and mature regions of human pENTR221 MANF. The corresponding BiFC expression plasmids (pEZY BiFC pre-NV-MANF) was made by LR clonase recombination reaction of pENTR221 pre-NV-MANF into pEZY Myc-His destination vector.

pEZY BiFC pre-NV-N-MANF and pre-NV-C-MANF constructs were generated using inverse PCR reactions the N-MANF or C-MANF specific primers, respectively and the pEZY BiFC pre-NV-MANF as a template.

### **Bimolecular fluorescence complementation assay (BiFC)**

HEK293 cells plated on covered with Poly-D-Lysine (P0899, Sigma-Aldrich) coverslips were co-transfected with pEZY BiFC N-Venus and C-Venus plasmids 48 hours after plating. Transfection with jetPEI transfection reagent (101, Polyplus-transfection) was performed according to the manufacturer's protocol. 20 hours after transfection the cells were fixed with 4% PFA, washed with PBS and permeabilized using 0.1% Triton X-100 in PBS (PBS-T). For nuclear and endoplasmic reticulum staining we used ER-ID® Red assay kit (ENZ-51026-K500, Enzo Life Sciences), containing Hoechst 33342 nuclear stain and ER-ID® Red detection reagent. ProLong™ Diamond Antifade Mountant (P36965, ThermoFisher Scientific) was used for mounting of coverslips. The imaging was performed using Leica SP8 STED confocal microscope, 63x glycerol immersion objective and Leica Application Suite X (LASX) software. Image analysis and processing (including brightness&contrast adjustment, same for all images) was done using CorelDRAW 2018.

### **IRE1 $\alpha$ oligomerization assay**

TREx-293IRE1 $\alpha$ -3FGHGFP cells (Li et. al., 2010) were plated 5000 cells/well on pre-coated with Poly-D-Lysine (0.1mg/ml) black Perkin Elmer plates in DMEM with 10% FBS and 100ug/ml Normocin. Next day the cells were transiently transfected with pTO-pre-SH-MANF-GW-FRT (MANF mutants) or pTO-SH-GW-FRT as a control vector, 100ng of plasmid/well for 24 hours using

PEI Transfection Reagent (1ug/ul in 1x PBS pH 4.5; 4:1 v/w ratio of PEI:DNA). After transfection, IRE1 $\alpha$ -GFP expression was induced with doxycycline (1ug/mL) treatment for 24 hours. ER stress was induced by treating the cells with the inhibitor of N-linked glycosylation tunicamycin (TM), 5ug/ml for 4 hours. After treatment, cells were fixed with 4% paraformaldehyde for 20 min and stained with DAPI (D9542, Sigma-Aldrich) in 1xPBS for 10 min. Imaging (16 sites/well) was performed using MolecularDevices Nano scanner. Three independent experiments have been analysed and quantified using CellProfiler 3.1.5 and CellProfiler Analyst 2.2.1 software.

### Western blot analysis I

HEK293 cells were plated 250000/well on 12 well plates in DMEM with 10% FBS and 100ug/ml normocin. Next day transient transfection of pTO-pre-SH-MANF-GW-FRT (MANF mutants) or pTO-SH-GW-FRT as a control was performed in the similar way as for IRE1 $\alpha$  oligomerization assay, 500ng of plasmid/well. 24 hours after transfection, the cells were starving for 4 hours (DMEM without FBS), and then treated with tunicamycin (TM) 5ug/ml for the times indicated. The lysis was performed in RIPA buffer (1% SDS, 10 mM Tris pH 8.0, containing protease and phosphatase inhibitor cocktail tablets (Roche)). The concentrations of total protein in cell lysates were measured using NanoDrop 2000 spectrophotometer. 20ug/well of total protein was loaded onto Bio-Rad mini-PROTEAN precast gels followed by the transfer onto nitrocellulose membrane for conventional western blotting or SuperSep<sup>TM</sup> Phos-tag<sup>TM</sup> (50 $\mu$ mol/L) Zn<sup>2+</sup> precast gels (FUJIFILM Wako, 198-17981) followed by the transfer onto polyvinylidene difluoride (PVDF) membrane for the detection of phosphorylated IRE1 $\alpha$  using the Phos-tag<sup>TM</sup> assay. The transfer have been done for 1hour on ice at RT. Pre-treatment of the membranes with EDTA for Phos-tag<sup>TM</sup> assay was performed according to the manufacturer's instructions. The membranes were blocked in 5% BSA TBS-T (or 5% milk TBS-T) for 1 hour at room temperature and then incubated with primary antibodies overnight at +4°C. The following primary antibodies were used: anti-IRE1 $\alpha$  (CST, 3294), IRE1 $\alpha$  pSer 724 (NovusBio, NB100-2323), GAPDH (EMD Millipore, MAB 374). Peroxidase-coupled secondary antibodies and the enhanced chemiluminescence (ECL) detection system have been used for western blot development.

### Western blot analysis II

MEFs cells were plated 250000/well on 12 well plates in DMEM with 5% FBS and non-essential amino acids. Next day the cells were treated with tunicamycin (TM) 500ng/ml for 4 hours, followed by treatment with exogenous human recombinant MANF (50nM) for 30, 60 and 240 minutes. The lysis was performed in RIPA buffer, containing protease and phosphatase inhibitor cocktail tablets (Roche)). The concentrations of total protein in cell lysates were measured using NanoDrop 2000 spectrophotometer. 20ug/well of total protein was loaded onto Bio-Rad mini-PROTEAN precast gels followed by the transfer onto nitrocellulose membrane. The transfer have been done for 1 hour on ice at RT. The membranes were blocked in 5% BSA TBS-T (or 5% milk TBS-T) for 1 hour at room temperature and then incubated with primary antibodies overnight at +4°C. The following primary antibodies were used: anti-IRE1 $\alpha$  (CST, 3294), IRE1 $\alpha$  pSer 724 (NovusBio, NB100-2323),  $\alpha$ -Tubulin (Sigma-Aldrich, T9026). Peroxidase-coupled secondary antibodies and the enhanced chemiluminescence (ECL) detection system have been used for western blot development.

## Neuronal culture and microinjection

Culture of mouse superior cervical ganglion sympathetic neurons and microinjection of these neurons was performed as described earlier (Yu et al., 2003). Briefly, the neurons of postnatal day 1–2 NMRI strain mice were grown 6 DIV on polyornithine-laminin (P3655 and CC095, Sigma-Aldrich)-coated dishes or glass coverslips with 30 ng/ml of 2.5 S mouse NGF (G5141, Promega) in the Neurobasal medium containing B27 supplement (17504044, Invitrogen). The nuclei were then microinjected with the expression plasmid for full-length MANF (pTO-pre-SH-MANF) together with a reporter plasmid for enhanced green fluorescent protein (EGFP), at concentration of 10 ng/ul in each experiment. For protein microinjection, recombinant full length MANF protein (P-101-100, Icosagen) in PBS at 200ng/ul was microinjected directly into the cytoplasm together with fluorescent reporter Dextran Texas Red (MW 70000 Da) (D1864, Invitrogen, Molecular Probes) that facilitates identification of successfully injected neurons. Next day, tunicamycin (2  $\mu$ M) (ab120296, Abcam) was added and living fluorescent (EGFP-expressing or Dextran Texas Red-containing) neurons were counted three days later and expressed as percentage of initial living fluorescent neurons counted 2–3 hours after microinjection.

## Immunocytochemistry

The neurons were cultured on glass coverslips and microinjected after 6-7 days in vitro with plasmid encoding for human wtMANF or its mutants. DNA concentration of 10 ng/ $\mu$ l was used. The cells were fixed with 4% PFA at 24 h after microinjection and stained with the following antibodies: rabbit anti-MANF (used in Lindholm et al. 2014), mouse anti-PDI (ADI-SPA-891-F, Enzo Life Sciences), mouse anti-GM130 (610823, BD Biosciences), goat anti-GRP78 (sc-1051, Santa Cruz Biotechnology Inc.), Alexa Fluor 488 goat anti-rabbit IgG (H+L) (A-11008, Invitrogen) and Alexa Fluor 568 goat anti-mouse IgG (H+L) (A-11004, Invitrogen). The nuclei were stained with DAPI (D9542, Sigma-Aldrich). The fluorescent image stacks were acquired using the confocal microscope TCS SP5 equipped with LAS AF 1.82 (Leica Microsystems Inc). The objective was Leica HCX PL APO x63/1.3 GLYC CORR CS (21 °C). The lasers used were DPSS 561 nm/20 mW, OPSL 488 nm/270 mW and diode 405 nm/50 mW, with the beam splitter QD 405/488/561/635. The confocal images were analysed by Imaris 9.2.1 software (Bitplane).

## Primary cultures of midbrain dopaminergic neurons and MANF mutant treatment

The midbrain floors were dissected from the ventral mesencephalic of 13 days old NMRI strain mouse embryos. The tissues were incubated with 0.5% trypsin (103139, MP Biomedical) in HBSS (Ca<sup>2+</sup>/Mg<sup>2+</sup>-free) (14170112, Invitrogen) for 20 min at +37°C, then mechanically dissociated. Cells were plated onto the 96-well plates coated with poly-L-ornithine (Sigma-Aldrich). Equal volumes of cell suspension were plated onto the center of the dish. The cells were grown for 5 days without any neurotrophic. Then, the cells were treated with thapsigargin (20nM) (T7458, Thermo Fisher Scientific) and wtMANF (100ng/ml) or MANF K96A (10ng/ml, 100ng/ml, 1  $\mu$ g/ml). After three days the neuronal cultures were fixed and stained with anti-Tyrosine Hydroxylase antibody (MAB318, Millipore Bioscience Research Reagents). Images were acquired by CellInsight high-content imaging equipment. Immunopositive neurons were counted by CellProfiler software and the data was analysed by CellProfiler analyst software. The results are expressed as % of cell survival compared non toxin treatment neurons.

## Testing MANF mutant in *in vivo* 6-OHDA model

### Experimental animals

Male Wistar rats (weight 230-270 g, Envigo, Netherlands) were housed in groups of 3 to 4 under a 12-h light-dark cycle at an ambient temperature of 20–23 °C. Food pellets (Harlan Teklad Global diet, Holland) and tap water were available ad libitum. Experiments were performed according to the 3R principles of EU directive 2010/63/EU on the care and use of experimental animals, as well as local laws and regulations, and were approved by the national Animal Experiment Board of Finland (protocol approval number ESAVI/12830/2020). All experiments were performed in a blinded manner and the rats were assigned to the treatment groups equally based on their rotational score at week 2.

### 6-OHDA lesioning

6-OHDA injections were done under isoflurane anesthesia essentially as described earlier (Penttinen et al., 2016, Voutilainen et al., 2009; Voutilainen et al., 2011). The animals received unilateral injections totaling 6 µg of 6-OHDA (Sigma Chemical CO, St. Louis, MO, USA; calculated as free base and dissolved in ice-cold saline with 0.02% ascorbic acid) in 3 deposits (2 µg / 1.5 µl each) in the right striatum using coordinates relative to the bregma (A/P + 1.6, L/M + 2.8, D/V–6; A/P 0.0, L/M +4.1, D/V -5.5 and A/P –1.2, L/M +4.5, D/V –5.5) (Paxinos and Watson, 1997). The rats were divided into treatment groups according to their amphetamine-induced rotations on two-week post lesion. After the behavioural tests, the rats were transcardially perfused and their brains were processed for TH immunohistochemistry.

### Intrastriatal administration of compounds

MANF and mutant MANF were intrastriatally administered to 6-OHDA lesioned rats two weeks after lesioning under isoflurane anesthesia using the same stereotaxic coordinates as with 6-OHDA injections. MANF and mutant MANF were injected in three locations in the striatum in three injections of equal volume. The total injected doses were for MANF and mutant MANF 10 µg. The total injection volume was adjusted to be 2 µl for all compounds.

D-Amphetamine-induced rotational behavior was measured at 2, 4, 6 and 8 weeks post lesion in automatic rotometer bowls (Med Associates, Inc., Georgia, USA) as previously described (Lindholm et al., 2007, Ungerstedt and Arbuthnott, 1970). Following a habituation period of 30 min, a single dose of D-amphetamine (2.5 mg/kg, Division of Pharmaceutical Chemistry, Faculty of Pharmacy, University of Helsinki, Finland) was injected intraperitoneally (i.p.). The rotation sensor recorded complete (360°) clockwise and counterclockwise-uninterrupted turns for a period of two hours and ipsilateral rotations were assigned a positive value.

### Quantification and statistical analysis

GraphPad Prism 7.0 software was used for statistical analysis. Statistical tests and sample sizes are indicated in the figure legends. A  $p < 0.05$  was considered statistically significant.

## References

1. Walter, P. & Ron, D. The unfolded protein response: from stress pathway to homeostatic regulation. *Science* **334**, 1081–1086 (2011).
2. Cox, J. S., Shamu, C. E. & Walter, P. Transcriptional induction of genes encoding endoplasmic reticulum resident proteins requires a transmembrane protein kinase. *Cell* **73**, 1197–1206 (1993).
3. Bertolotti, A. et al. Dynamic interaction of BiP and ER stress transducers in the unfolded-protein response. *Nat. Cell Biol.* **2**, 326–332 (2000).
4. Karagöz, G. E. et al. An unfolded protein-induced conformational switch activates mammalian IRE1. *eLife* **6**, e30700 (2017).
5. Amin-Wetzel, N. et al. A J-Protein Co-chaperone Recruits BiP to Monomerize IRE1 and Repress the Unfolded Protein Response. *Cell* **171**, 1625–1637 (2017).
6. Preissler, S. & Ron, D. Early Events in the Endoplasmic Reticulum Unfolded Protein Response. *Cold Spring Harb. Perspect. Biol.* **11**, a033894 (2019).
7. Carrara, M. et al. Noncanonical binding of BiP ATPase domain to Ire1 and Perk is dissociated by unfolded protein CH1 to initiate ER stress signaling. *eLife* **4**, e03522 (2015).
8. Kopp, M. C. et al. In vitro FRET analysis of IRE1 and BiP association and dissociation upon endoplasmic reticulum stress. *eLife* **5**, e30257 (2018).
9. Sepulveda, D. et al. Interactome Screening Identifies the ER Luminal Chaperone Hsp47 as a Regulator of the Unfolded Protein Response Transducer IRE1 $\alpha$ . *Mol. Cell* **69**, 238–252 (2018).
10. Eletto, D. et al. Protein disulfide isomerase A6 controls the decay of IRE1 $\alpha$  signaling via disulfide-dependent association. *Mol. Cell* **53**, 562–576 (2014).
11. Petrova, P. et al. MANF: a new mesencephalic, astrocyte-derived neurotrophic factor with selectivity for dopaminergic neurons. *J. Mol. Neurosci.* **20**, 173–187 (2003).
12. Lindholm, P. et al. Novel neurotrophic factor CDFN protects and rescues midbrain dopamine neurons *in vivo*. *Nature* **448**, 73–77 (2007).
13. Lindahl, M., Saarma, M. & Lindholm, P. Unconventional neurotrophic factors CDFN and MANF: Structure, physiological functions and therapeutic potential. *Neurobiol. Dis.* **97(Pt B)**, 90–102 (2017).
14. Voutilainen, M. H. et al. Mesencephalic astrocyte-derived neurotrophic factor is neurorestorative in rat model of Parkinson's disease. *J Neurosci.* **29**, 9651–9659 (2009).
15. Lindahl, M. et al. MANF is indispensable for the proliferation and survival of pancreatic  $\beta$  cells. *Cell Rep* **7**, 366–375 (2014).
16. Danilova, T. et al. MANF is required for the postnatal expansion and maintenance of pancreatic  $\beta$ -cell mass in mice. *Diabetes* **68**, 66–80 (2019).
17. Apostolou, A. et al. Armet, a UPR-upregulated protein, inhibits cell proliferation and ER stress-induced cell death. *Exp. Cell Res.* **314**, 2454–2467 (2008).
18. Mizobuchi, N. et al. ARMET is a soluble ER protein induced by the unfolded protein response via ERSE-II element. *Cell Struct. Funct.* **32**, 41–50 (2007).
19. Tadimalla, A. et al. Mesencephalic astrocyte-derived neurotrophic factor is an ischemia-inducible secreted endoplasmic reticulum stress response protein in the heart. *Circ. Res.* **103**, 1249–1258 (2008).
20. Hellman, M. H. et al. Mesencephalic astrocyte-derived neurotrophic factor (MANF) has a unique mechanism to rescue apoptotic neurons. *J. Biol. Chem.* **286**, 2675–2680 (2011).
21. Pakarinen, E. et al. MANF ablation causes prolonged activation of the UPR without neurodegeneration in the mouse midbrain dopamine system. *eNeuro* ENEURO.0477-19.2019 (2020).
22. Sousa-Victor, P. et al. MANF regulates metabolic and immune homeostasis in ageing and protects against liver damage. *Nat. Metab.* **1**, 276–290 (2019).

23. Mätlik, K. et al. Role of two sequence motifs of mesencephalic astrocyte-derived neurotrophic factor in its survival-promoting activity. *Cell Death Dis.* **6**, e2032 (2015).
24. Glembotski, C. C. et al. Mesencephalic astrocyte-derived neurotrophic factor protects the heart from ischemic damage and is selectively secreted upon sarco/endoplasmic reticulum calcium depletion. *J. Biol. Chem.* **287**, 25893–25904 (2012).
25. Bell, P. A. et al. Mesencephalic astrocyte-derived neurotrophic factor is an important factor in chondrocyte ER homeostasis. *Cell Stress Chaperon* **24**, 159–173 (2019).
26. Eesmaa, A. et al. MANF is an ATP-binding protein interacting with ER chaperones and regulating ER stress in neurons (under review)
27. Yan, Y. et al. MANF antagonizes nucleotide exchange by the endoplasmic reticulum chaperone BiP. *Nat Commun* **10**, 541 (2019).
28. Bommiasamy, H. & Popko, B. Animal models in the study of the unfolded protein response. *Meth. Enzymol* **491**, 91–109 (2011).
29. Hetz, C. The unfolded protein response: controlling cell fate decisions under ER stress and beyond. *Nat. Rev. Mol. Cell Biol.* **13**, 89–102 (2012).
30. Zampese, E. & Pizzo, P. Intracellular organelles in the saga of Ca<sup>2+</sup> homeostasis: different molecules for different purposes?. *Cell. Mol. Life Sci* **69**, 1077–1104 (2012).
31. Mekahli, D. et al. Endoplasmic-reticulum calcium depletion and disease. *Cold Spring Harb. Perspect. Biol* **3**, a004317 (2011).
32. Parkash, V. et al. The structure of the conserved neurotrophic factors MANF and CDFN explains why they are bifunctional. *Protein Eng. Des. Sel.* **22**, 233–241 (2009).
33. Prischi, F. et al. Phosphoregulation of Ire1 RNase splicing activity *Nat. Commun.* **5**, 3554 (2014).
34. Li, H. et al. Mammalian endoplasmic reticulum stress sensor IRE1 signals by dynamic clustering. *Proc. Natl Acad. Sci. USA* **107**, 16113–16118 (2010).
35. Lindholm, P. et al., MANF is widely expressed in mammalian tissues and differently regulated after ischemic and epileptic insults in rodent brain. *Mol. Cell. Neurosci.* **39**, 356–371 (2008).
36. Wang, P. et al. The luminal domain of the ER stress sensor protein PERK binds misfolded proteins and thereby triggers PERK oligomerization. *J Biol Chem* **293**, 4110–4121 (2018).
37. Kranz, P. et al. PDI is an essential redox-sensitive activator of PERK during the unfolded protein response (UPR). *Cell Death Dis.* **8**, e2986 (2017).
38. Neves, J. et al. Immune modulation by MANF promotes tissue repair and regenerative success in the retina. *Science* **353**, aaf3646 (2016).
39. Bai, M. et al. Conserved roles of *C. elegans* and human MANFs in sulfatide binding and cytoprotection. *Nat Commun.* **9**, 897 (2018).
40. Morita, S. et al. Targeting ABL-IRE1 $\alpha$  Signaling Spares ER-Stressed Pancreatic  $\beta$  Cells to Reverse Autoimmune Diabetes. *Cell Metab.* **25**, 883–897.e8 (2017).
41. Lee, A. H. et al. XBP-1 regulates a subset of endoplasmic reticulum resident chaperone genes in the unfolded protein response. *Mol Cell Biol.* **23**, 7448–7459 (2003).
42. Kakazu, E. et al. Hepatocytes release ceramide-enriched pro-inflammatory extracellular vesicles in an IRE1 $\alpha$ -dependent manner. *J Lipid Res.* **57**, 233–245 (2016).
43. Cao, J. et al. Endotoxemia-mediated activation of acetyltransferase P300 impairs insulin signaling in obesity. *Nat Commun* **8**, 131 (2017).
44. Nishitoh, H. et al. ASK1 is essential for endoplasmic reticulum stress-induced neuronal cell death triggered by expanded polyglutamine repeats. *Genes Dev* **16**, 1345–1355 (2002).
45. Brozzi, F. & Eizirik, D. L. ER stress and the decline and fall of pancreatic beta cells in type 1 diabetes. *Ups J Med Sci* **121**, 133–139 (2016).

46. Kaneko, M. et al. Activation signal of nuclear factor kappa B in response to endoplasmic reticulum stress is transduced via IRE1 and tumor necrosis factor receptor-associated factor 2. *Biol.Pharm.Bull.* **26**, 931–935 (2003)
47. Hu, P. et al. Autocrine tumor necrosis factor alpha links endoplasmic reticulum stress to the membrane death receptor pathway through IRE1alpha-mediated NF-kappaB activation and down-regulation of TRAF2 expression. *Mol Cell Biol.* **26**, 3071–3084 (2006).
48. Hakonen, E. et al. MANF protects human pancreatic beta cells against stress-induced cell death. *Diabetologia* **61**, 2202–2214 (2018).
49. Chen, L. et al. Mesencephalic astrocyte-derived neurotrophic factor is involved in inflammation by negatively regulating the NF- $\kappa$ B pathway. *Sci Rep.* **5**, 8133 (2015).
50. Ghosh, R. et al. Allosteric inhibition of the IRE1 $\alpha$  RNase preserves cell viability and function during endoplasmic reticulum stress. *Cell* **158**, 534–548 (2014).
51. Weintraub, M. K. et al. Imatinib methanesulfonate reduces hippocampal amyloid- $\beta$  and restores cognitive function following repeated endotoxin exposure. *Brain Behav Immun* **33**, 24–28 (2013).
52. Su, E. J. et al. Imatinib treatment reduces brain injury in a murine model of traumatic brain injury. *Front Cell Neurosci* **9**, 385 (2015).
53. Zhou, J. et al. The crystal structure of human IRE1 luminal domain reveals a conserved dimerization interface required for activation of the unfolded protein response. *Proc.Natl.Acad.Sci.USA* **103**, 14343–14348 (2006).
54. Kozakov, D. et al. PIPER: An FFT-based protein docking program with pairwise potentials. *Proteins: Struct., Funct., Bioinf.* **65**, 392–406 (2006).
55. Kozakov, D. et al. Optimal clustering for detecting near-native conformations in protein docking. *Biophys. J.* **89**, 867–975 (2005).
56. Paschalidis, I.C. et al. SDU: A Semidefinite Programming-Based Underestimation Method for Stochastic Global Optimization in Protein Docking. *IEEE Trans. Automat. Contr.* **52**, 664–676 (2007).
57. Morris, G. M. et al. Autodock4 and AutoDockTools4: automated docking with selective receptor flexibility. *J. Comput. Chem.* **16**, 2785–91 (2009).
58. Yu, L. Y. et al. GDNF-deprived sympathetic neurons die via a novel nonmitochondrial pathway. *J Cell Biol.* **163**, 987–997 (2003).
59. Penttinen, A. M. et al. Characterization of a new low-dose 6-hydroxydopamine model of Parkinson's disease in rat. *J Neurosci Res* **94**, 318–328 (2016).
60. Voutilainen, M. H. et al. Chronic infusion of CDFN prevents 6-OHDA-induced deficits in a rat model of Parkinson's disease. *Exp. Neurol.* **228**, 99–108 (2011).
61. Paxinos, G. & Watson C. *The Rat Brain in Stereotaxic Coordinates*, 3rd Edn. San Diego, CA: Academic Press (1997).
62. Ungerstedt, U. & Arbuthnott, G. W. Quantitative recording of rotational behavior in rats after 6-hydroxy-dopamine lesions of the nigrostriatal dopamine system. *Brain Res.* **24**, 485–493 (1970).
63. Penttinen, A. M. et al. Implementation of deep neural networks to count dopamine neurons in substantia nigra. *Eur. J. Neurosci.* **48**, 2354–2361 (2018).
64. Albert, K. et al. Downregulation of tyrosine hydroxylase phenotype after AAV injection above substantia nigra: Caution in experimental models of Parkinson's disease. *J. Neurosci. Res.*, **97**, 346–361 (2019).

## Acknowledgements

The study has been supported by Jane and Aatos Erkko Foundation and Sigrid Jusélius Foundation. Lucie Küll, Susanna Wiss, Mari Heikkinen, Carina Gutenbrunner, Iannis Charnay, Karola

Meininghaus and are thanked for their technical help. Peter Walter is thanked for sharing the IRE1 $\alpha$ -3FGH-GFP construct. We are grateful to Claudio Hetz for sharing the IRE1 $\alpha^{-/-}$  MEFs cells and for fruitful discussions. We thank Mikko Airavaara, Andrii Domanskyi and Maria Lindahl for critical comments.

### **Author Contributions**

VK designed and performed MST, PLA, BiFC, WB, PhosTag-WB, oligomerization experiments, analysed the data, prepared the figures and wrote the manuscript. LY have performed survival studies in SCG and DA neurons, ICC of MANF mutants. LI and MK planned and performed molecular docking experiments. MV designed and performed *in vivo* experiments with MANF mutant. JN performed the analysis of *in vivo* experiments with MANF mutant. AE designed molecular cloning for BIFC experiments and generated MANF mutant constructs. EPK and JH designed and performed gel filtration chromatography and helped in structural analysis. MS supervised the experiments, participated in the designs, in manuscript writing and provided funding. All the authors read and approved the final version of the manuscript.

### **Competing interests**

The authors declare no competing interests. MS is the inventor in the MANF-related patent owned by Herantis Pharma Plc.



## Figure 1

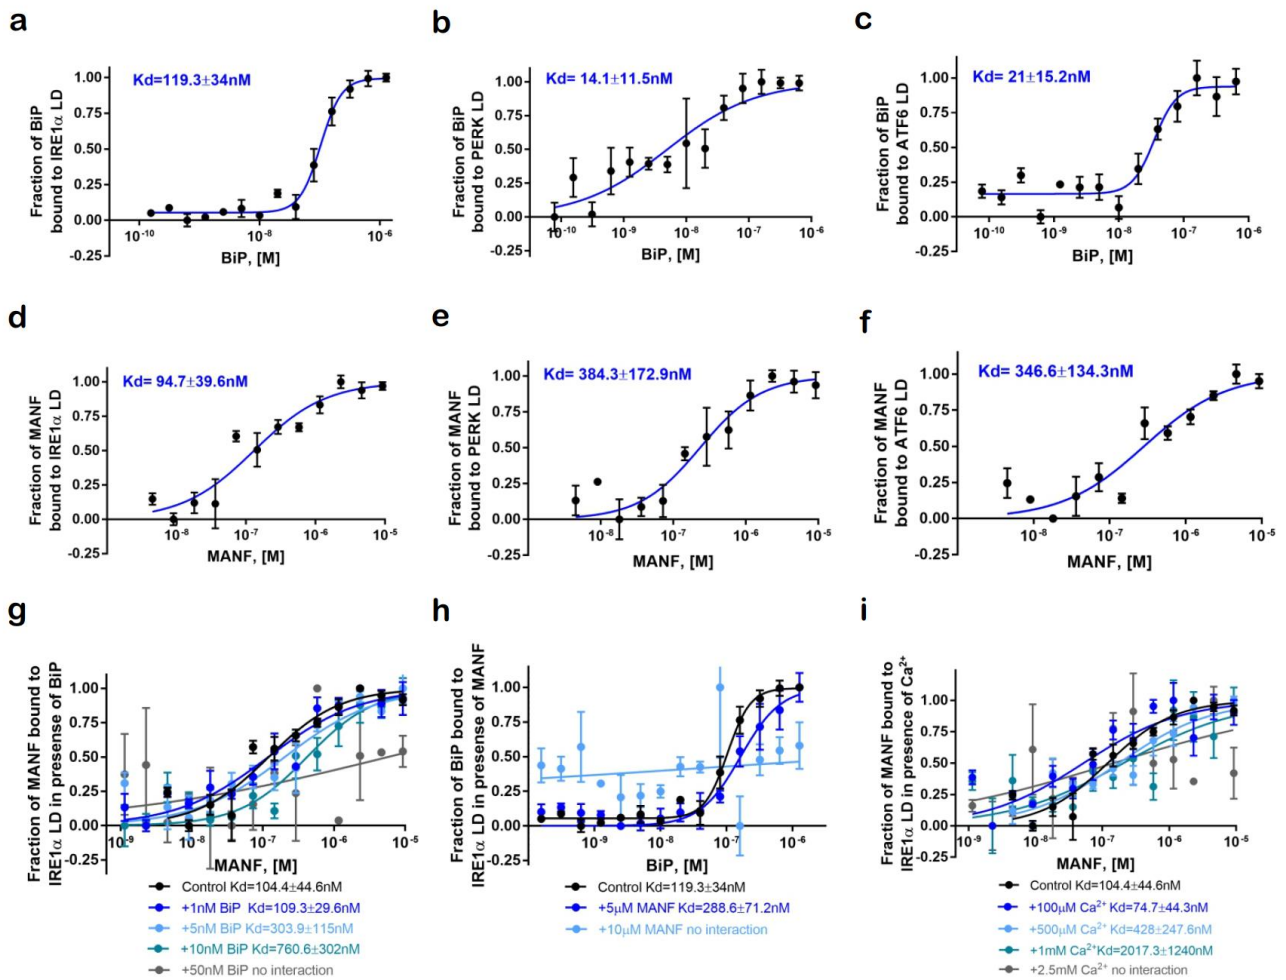

**Fig. 1 | MANF directly interacts with luminal domain of IRE1 $\alpha$  and BiP is preventing MANF interaction with IRE1 $\alpha$ .**

**a, b, c,** Labeled through His-tag luminal domains (LDs) of IRE1 $\alpha$ , PERK, ATF6 (20nM) interact with unlabeled titrated recombinant purified BiP protein (0-640 nM), as shown using microscale thermophoresis (MST). **d, e, f,** Purified recombinant MANF protein (0-9.3  $\mu\text{M}$ ) is interacting with labeled through His-tag LDs of UPR sensors IRE1 $\alpha$ , PERK, ATF6 (20nM). **g,** MANF-IRE1 $\alpha$  LD interaction in presence of BiP (1-50 nM). Purified recombinant MANF protein is titrated (0-9.3  $\mu\text{M}$ ), and IRE1 LD concentration is 20nM. **h,** BiP-IRE1 $\alpha$  LD interaction is in presence of 5 $\mu\text{M}$  (10  $\mu\text{M}$ ) of purified MANF protein (10 nM-1 $\mu\text{M}$ ). Purified BiP protein is titrated (0-640 nM) and incubated with Alexa647-labeled through His-tag luminal domain of IRE1 $\alpha$  (20nM). **i,** Interaction of unlabeled titrated human recombinant MANF (0-9.3  $\mu\text{M}$ ) with Alexa647-labeled through His-tag luminal domain of IRE1 $\alpha$  (20nM) in presence of increasing concentrations of Ca $^{2+}$  concentration (100 $\mu\text{M}$ -2.5mM). Microscale thermophoresis binding curves, showing mean fraction bound values from n=3-5 experiments per binding pair  $\pm$ SEM,  $K_d$  values  $\pm$ error estimations are indicated.

## Figure 2

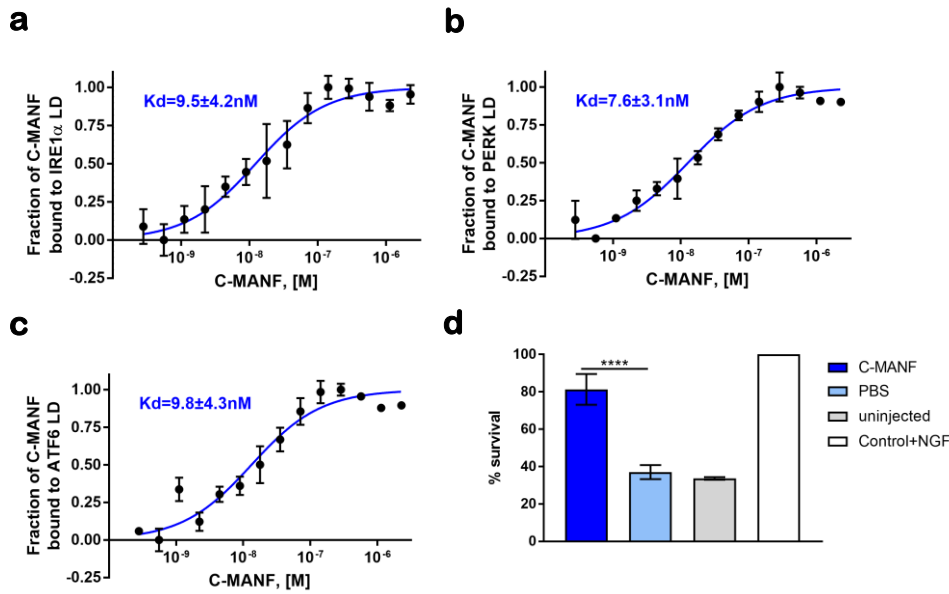

**Fig. 2 | C-MANF directly interacts with luminal domain of IRE1 $\alpha$ .**

**a, b, c,** Chemically synthesized C-MANF (0-2.28  $\mu$ M) is interacting with labeled through His-tag LDs of UPR sensors IRE1 $\alpha$ , PERK, ATF6 (20nM). Microscale thermophoresis binding curves, showing mean fraction bound values from n=3-4 experiments per binding pair  $\pm$ SEM, K<sub>d</sub> values  $\pm$ error estimations are indicated. **d,** Microinjections of C-MANF protect sympathetic SCG neurons upon nerve growth factor (NGF) deprivation, n=3.

## Figure 3

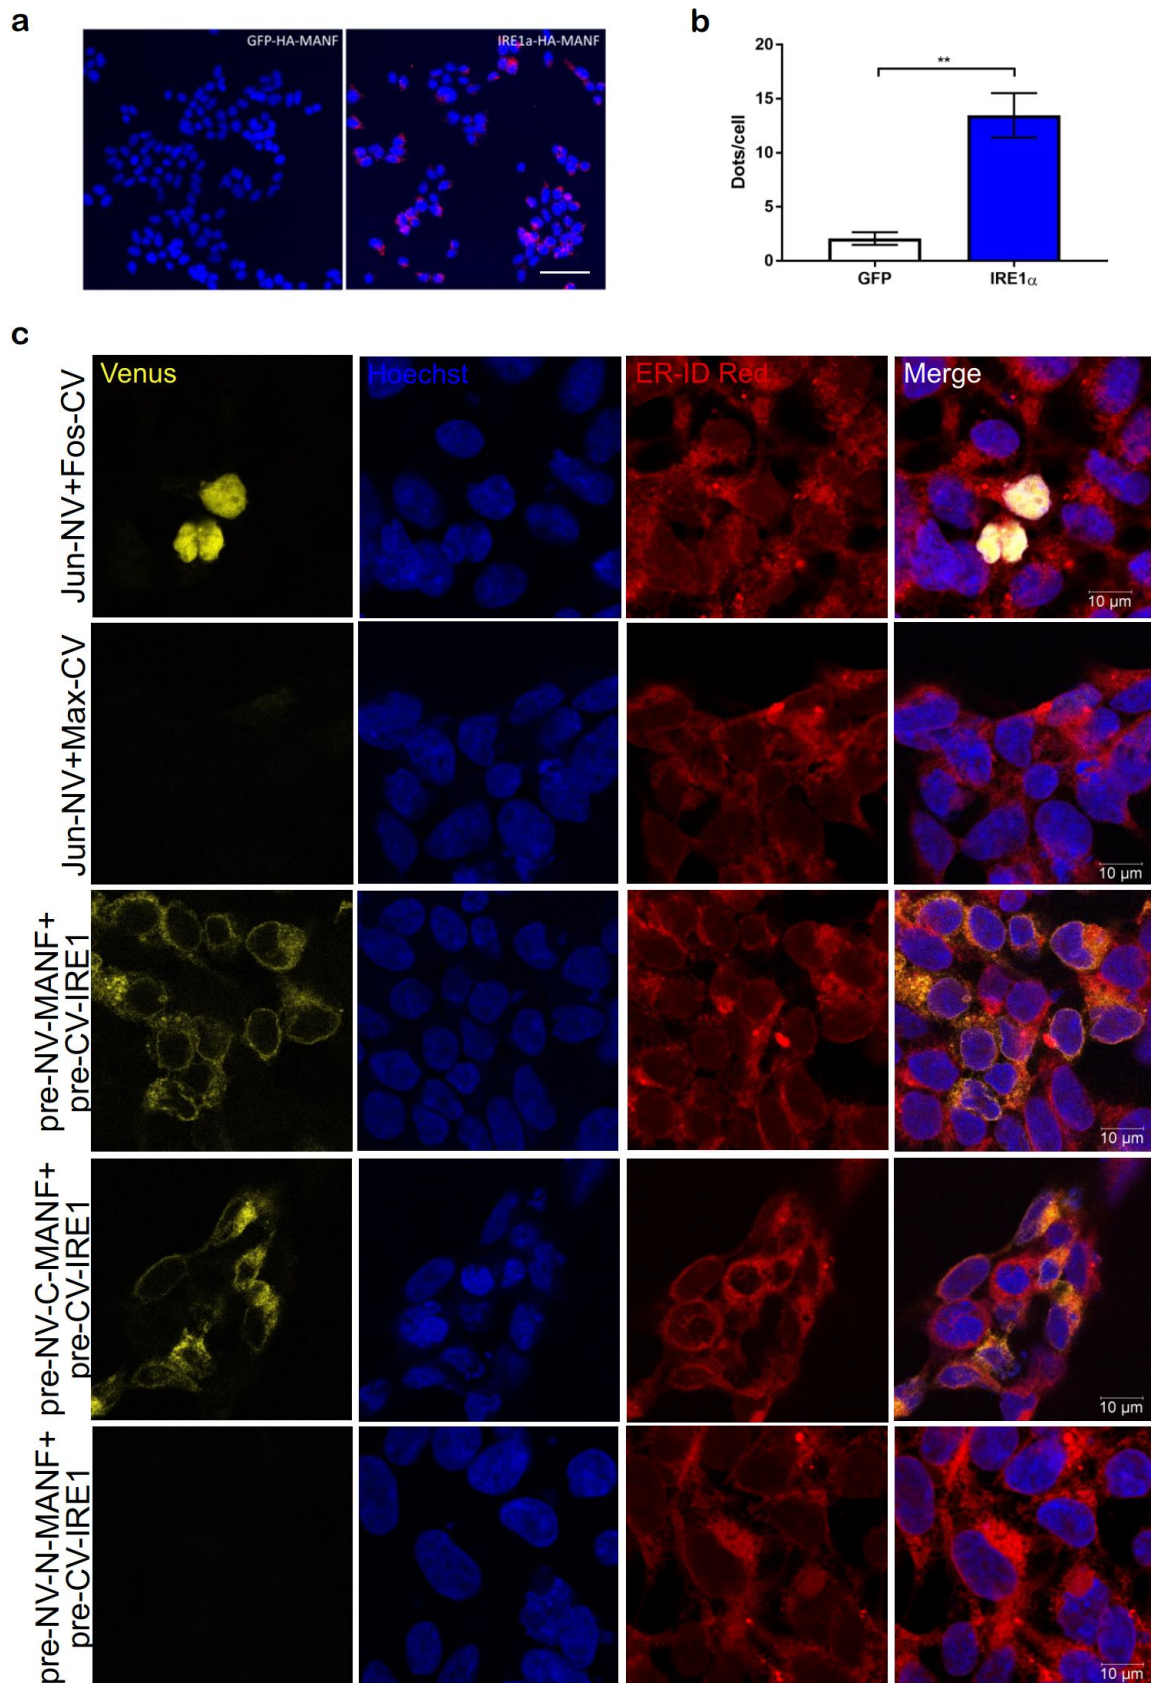

**Fig. 3 | MANF interacts with IRE1 $\alpha$  in cells**

**a**, Representative image of MANF-IRE1 $\alpha$ -HA interaction in Flp-in TREx293 cells, Flp-in TREx293 GFP-HA was used as a negative control. **b**, Quantification of dots per cell for MANF-IRE1 $\alpha$ -HA interaction versus MANF-GFP-HA interaction. Mean dots/cell values  $\pm$ SEM from n=3 independent experiments are indicated. Statistical analysis was performed using Student's t test: \*\*:  $p < 0.01$ . **c**, MANF interacts with IRE1 $\alpha$  through its C-terminal domain but not N-terminal domain in HEK293 cells, as shown using bimolecular fluorescence complementation assay (BiFC), n=3. Statistical analysis was performed using one-way ANOVA, followed by Holm-Sidak's multiple comparison test, \*\*\*\*:  $p < 0.0001$ .

## Figure 4

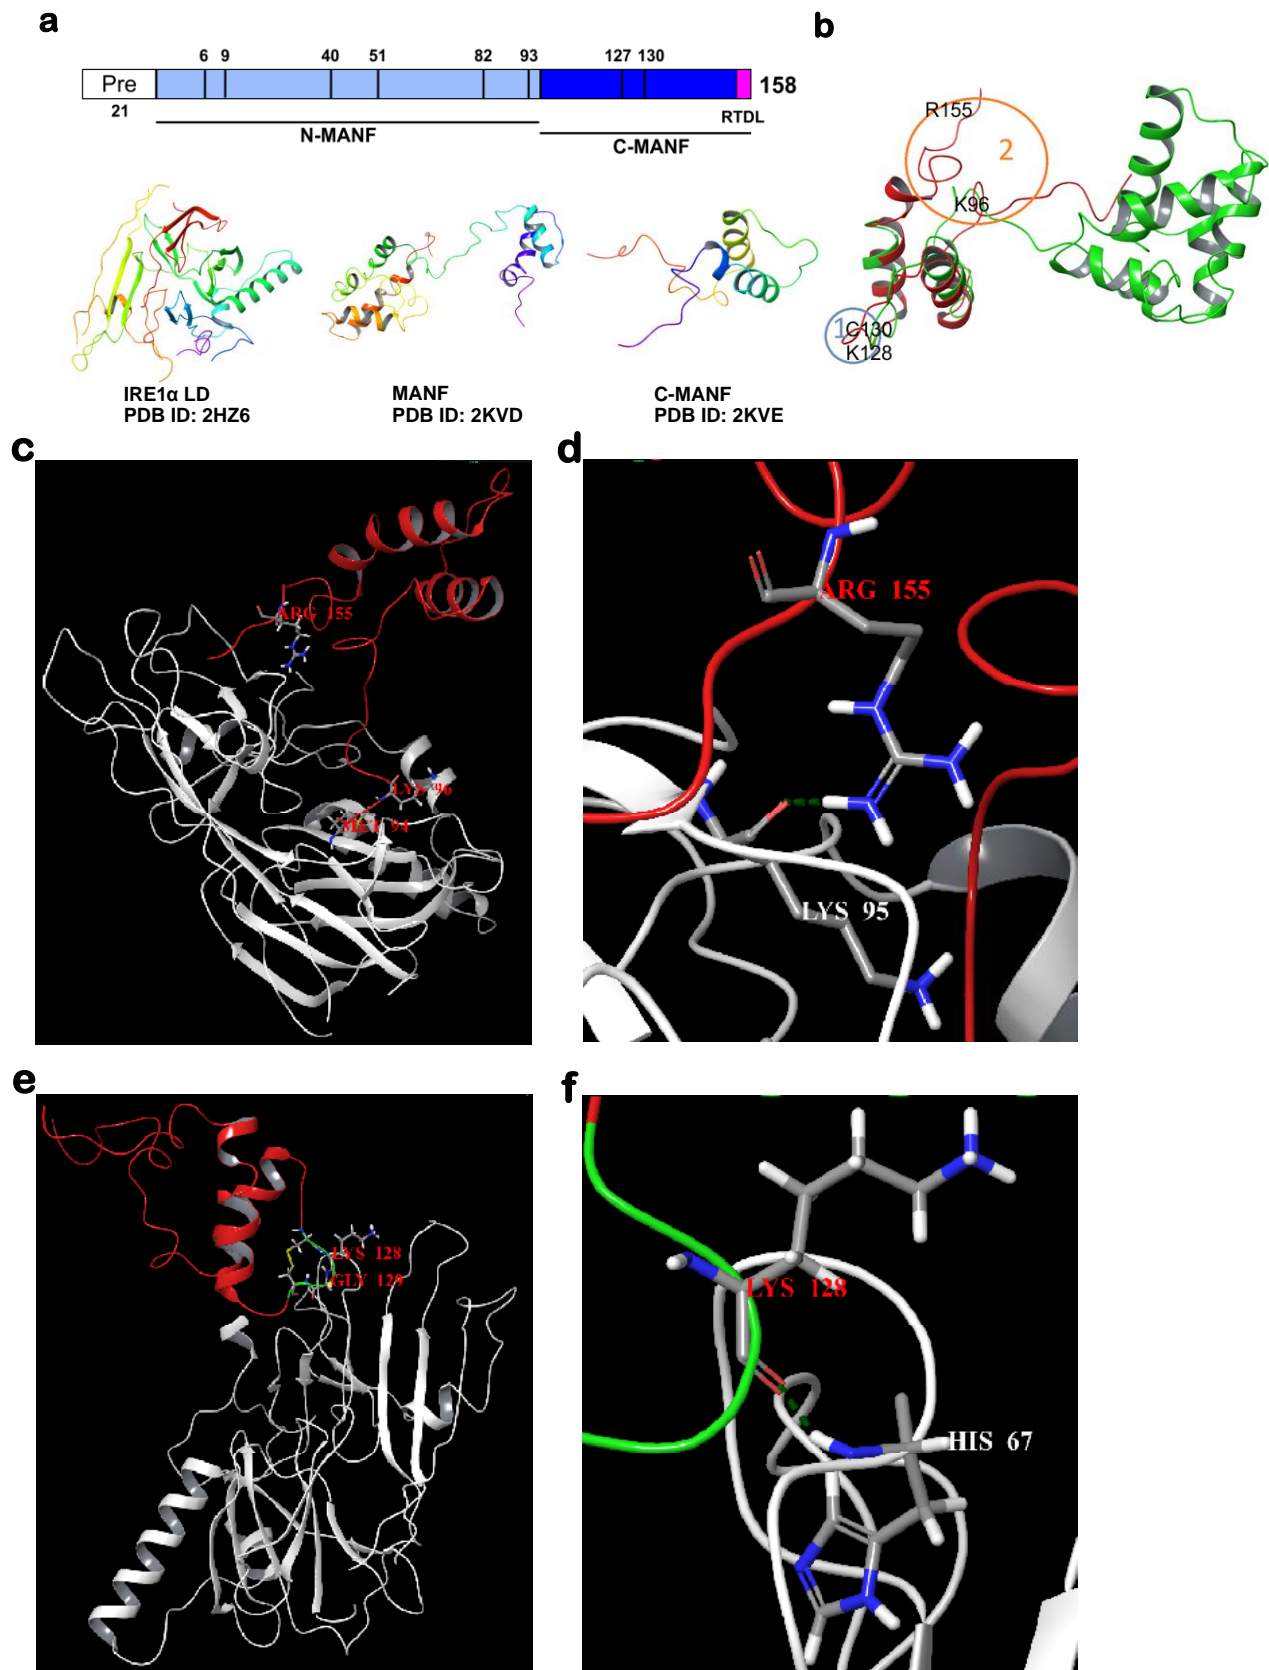

**Fig. 4 | Putative MANF-IRE1 $\alpha$  binding sites, predicted using molecular dynamics and molecular docking**

**a**, Scheme of two-domain MANF structure and PDB structures used for computational modeling. **b**, Putative IRE1 $\alpha$  binding regions 1 and 2 in the aligned structures of the C-terminal of MANF (pdb:2KWE, red ribbon) and whole MANF (pdb:2W51, green ribbon). **c**, Relative position of MANF and IRE1 $\alpha$  proteins in complex configuration 12. **d**, The hydrogen bond between Arg155 amino acid residue of MANF and Lys95 amino acid residue of IRE1 $\alpha$  proteins in complex configuration 12 (hydrogen bond is represented as green dashed line). **e**, Relative position of MANF and IRE1 $\alpha$  proteins in complex configuration 41. The cysteine loop of the MANF is given in green color. **f**, The hydrogen bond between Lys128 amino acid residues of MANF and His67 amino acid residue of IRE1 $\alpha$  proteins in complex configuration 41 (hydrogen bond is represented as green dashed line).

Figure 5

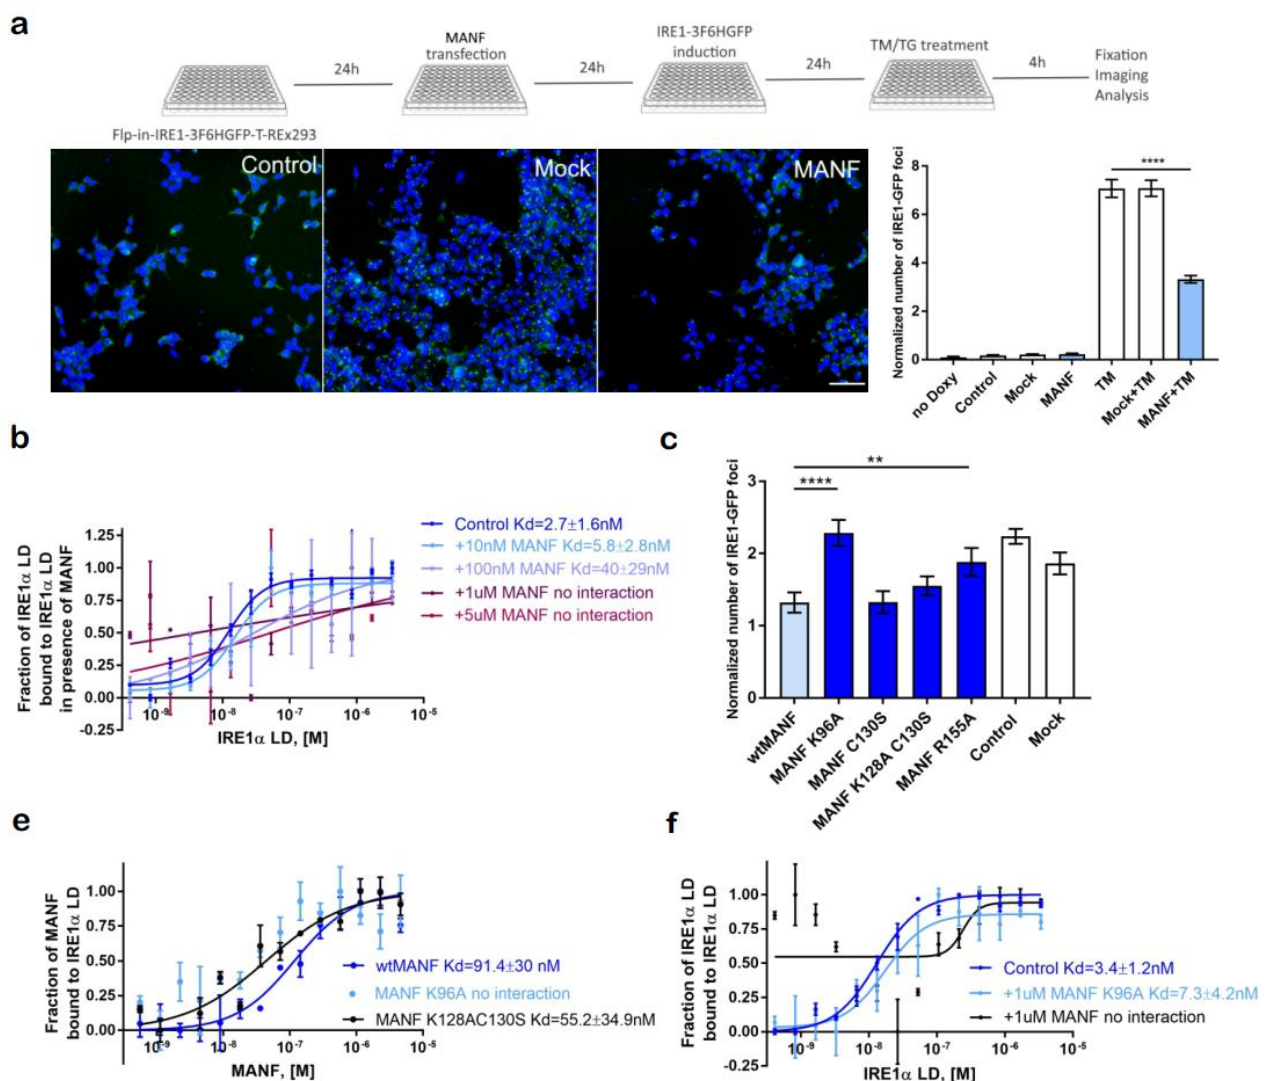

**Fig. 5 | MANF is decreasing IRE1 $\alpha$  oligomerization and IRE1 $\alpha$  binding deficient MANF mutant is not affecting IRE1  $\alpha$  oligomerization upon ER stress**

**a**, MANF-overexpression is decreasing IRE1 $\alpha$  oligomerization upon ER stress, timeline of experiment and representative image. A stable Flp-In293 T-REx cell line expressing reporter IRE1 $\alpha$ -3F6HGFP upon doxycycline induction was transfected with hMANF cDNA expressing plasmid. IRE1 $\alpha$ -oligomerization was induced by the inhibitor of N-linked glycosylation tunicamycin, TM (5  $\mu$ g/ml) for 4 h. Scale bar, 100 $\mu$ m. In quantification of MANF effect on IRE1 $\alpha$  oligomerization upon ER stress the normalized number of IRE1 $\alpha$ -GFP foci stands for the number of IRE1 $\alpha$ -GFP clusters to total cell count. Statistical analysis was performed using one-way ANOVA, followed by Holm-Sidak's multiple comparison test, n=3, \*\*\*\*: p < 0.0001. **b**, Interaction of unlabeled titrated purified IRE1 $\alpha$  LD (0-3.39  $\mu$ M) with labeled through His-tag IRE1 $\alpha$  LD (20 nM) is affected in presence of increasing concentration of recombinant purified MANF (10 nM-5  $\mu$ M). Microscale thermophoresis binding curves, showing mean fraction bound values from n=2-4 individual repeats per binding pair  $\pm$ SEM, Kd values $\pm$ error estimations are indicated. **c**, The overexpression of MANF K96A and MANF R155A mutants is not affecting IRE1 $\alpha$  oligomerization upon ER stress, induced by tunicamycin, TM (5 mg/ml) for 4 hours. Number of IRE1 $\alpha$  -GFP foci to total cell count is indicated. Statistical analysis was performed using one-way ANOVA, followed by Holm-Sidak's multiple comparison test, n=3, \*\*: p < 0.01, \*\*\*\*: p < 0.0001. **e**, Labeled through His-tag luminal domain of IRE1 $\alpha$  (20nM) is not interacting with unlabeled titrated recombinant purified MANF K96A mutant protein (0-4.6  $\mu$ M), while its affinity to MANF K128AC130S protein (0-4.6  $\mu$ M) is the same as to wtMANF protein (0-4.6  $\mu$ M), as shown using microscale thermophoresis (MST). Microscale thermophoresis binding curves, showing mean fraction bound values from n=3-5 individual repeats per binding pair  $\pm$ SEM, Kd values $\pm$ error estimations are indicated. **f**, Interaction of unlabeled titrated purified IRE1 $\alpha$  LD (0-3.39  $\mu$ M) with labeled through His-tag IRE1 $\alpha$  LD (20 nM) is not affected in presence of 1 $\mu$ M recombinant purified MANF K96A mutant protein. Microscale thermophoresis binding curves, showing mean fraction bound values from n=3-4 individual repeats per binding pair  $\pm$ SEM, Kd values $\pm$ error estimations are indicated.

## Figure 6

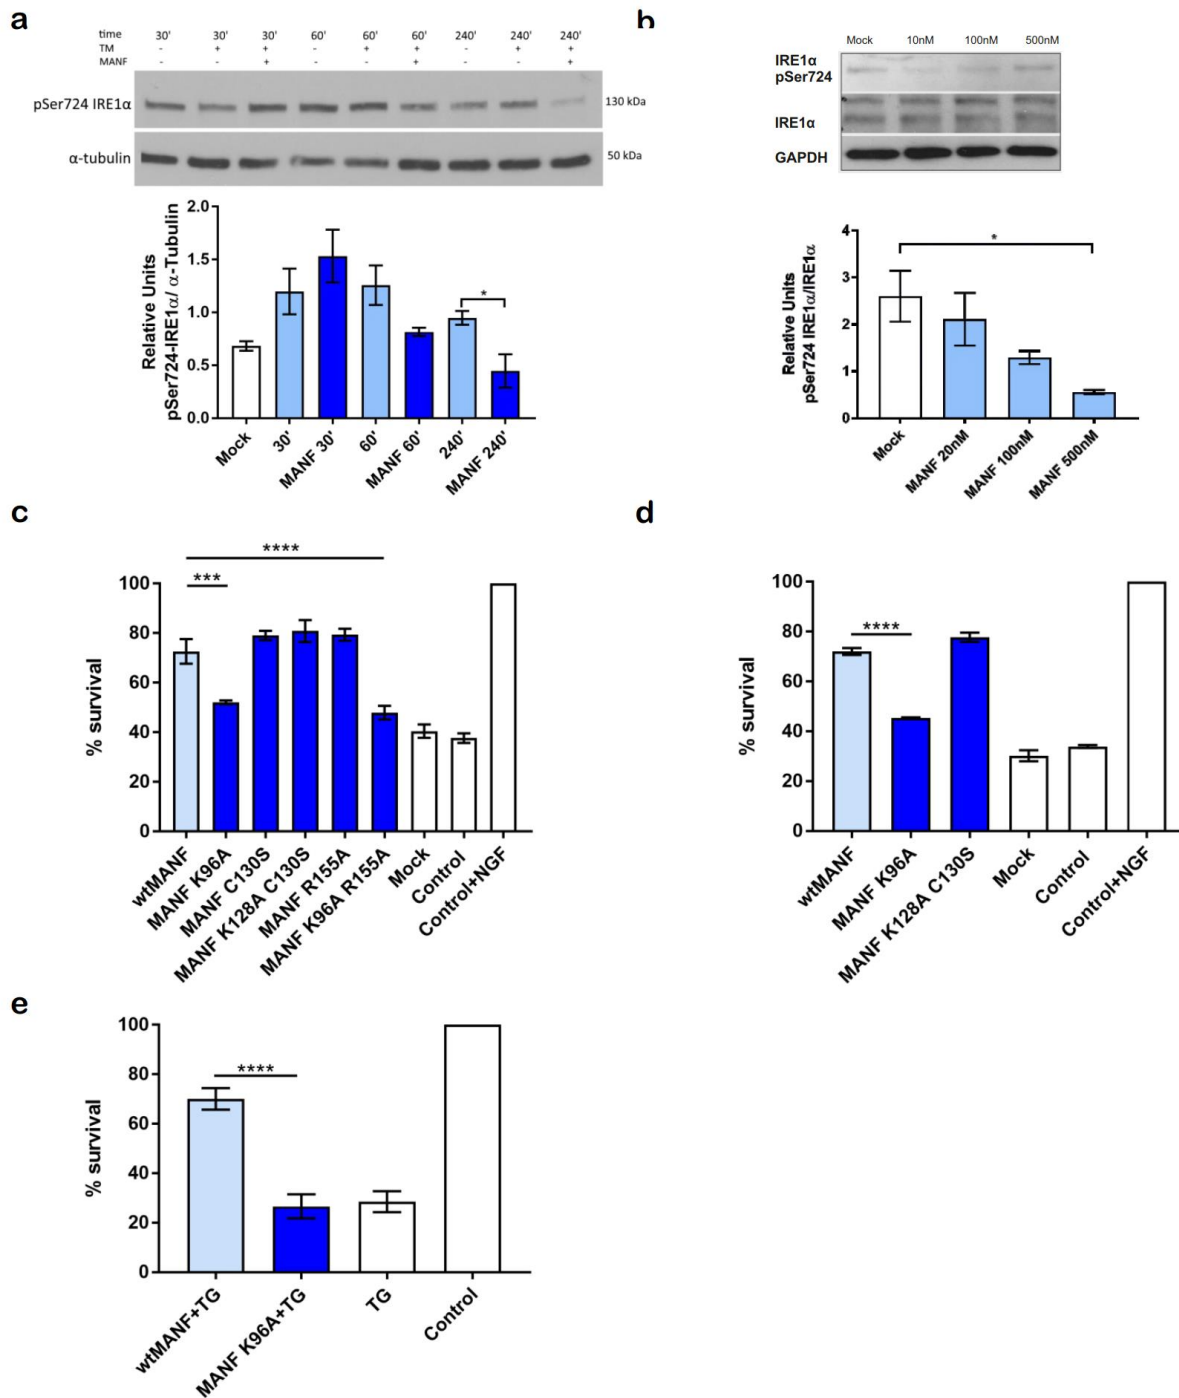

**Fig. 6 | MANF is decreasing phosphorylation of IRE1α. MANF-IRE1α interaction is crucial for the survival of mouse sympathetic and dopamine neurons in ER stress.**

**a**, Representative image and quantification of pSer724 IRE1α in IRE1α-HA-MEFs treated 4 hours with tunicamycin 1μg/μl, followed by 30, 60 and 240 minutes of treatment with human MANF (50nM), pSer724 IRE1α is normalized to α-tubulin level, the mean±SEM values for n=3 independent experiments are indicated **b**, Representative image and quantification of pSer724 IRE1α in IRE1α-HA-MEFs deprived from amino acids for 24 hours, followed by 24 hour treatment with human



recombinant MANF (20, 100 and 500nM), pSer724 IRE1 $\alpha$  is normalized to IRE1 $\alpha$  level, the mean $\pm$ SEM values for n=2 independent experiments are indicated. **c**, Microinjections of MANF K96A and MANF K96A R155A MANF mutant plasmids to SCG neurons are not rescuing them from TM-induced apoptosis. **d**, Microinjections of recombinant purified MANF K96A mutant protein to SCG neurons are not rescuing them from TM-induced apoptosis. Statistical analysis was performed using one-way ANOVA, followed by Holm-Sidak's multiple comparison test, n=3, \*: p < 0.05, \*\*\*: p < 0.001, \*\*\*\*: p < 0.0001. **e**, MANF K96A is not protecting dopamine (DA) neurons from ER stressed induced apoptosis. DA were cultured 5-7 days *in vitro*, ER stress was induced by treatment with 200 nM thapsigargin (TG). MANF (100ng/ml) or MANF K96A (100ng/ml) were added to the cultures at the same time as TG. Statistical analysis was performed using one-way ANOVA, followed by Holm-Sidak's multiple comparison test, n=4, \*\*\*\*: p < 0.0001.

## Figure 7

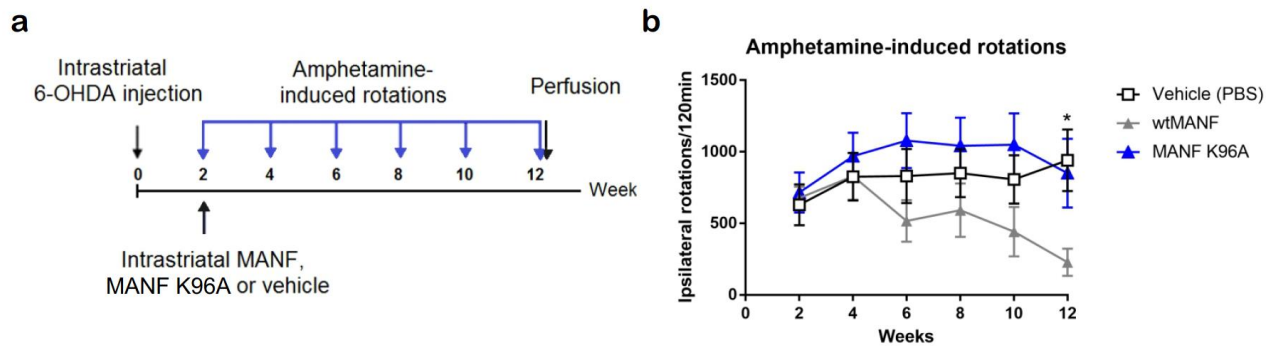

**Fig. 7 | MANF mutant deficient for IRE1 $\alpha$  binding does not affect rotational behavior in 6-OHDA model of Parkinson's disease *in vivo*.**

**a**, Experimental paradigm for the study. **b**, Amphetamine-induced rotations. Vehicle-treated rats show robust turning behaviour. Single intrastriatal wtMANF injection reduces turning behaviour as compared to Vehicle-treated rats.  $P=0.0146$ , ANOVA.

Figure 8

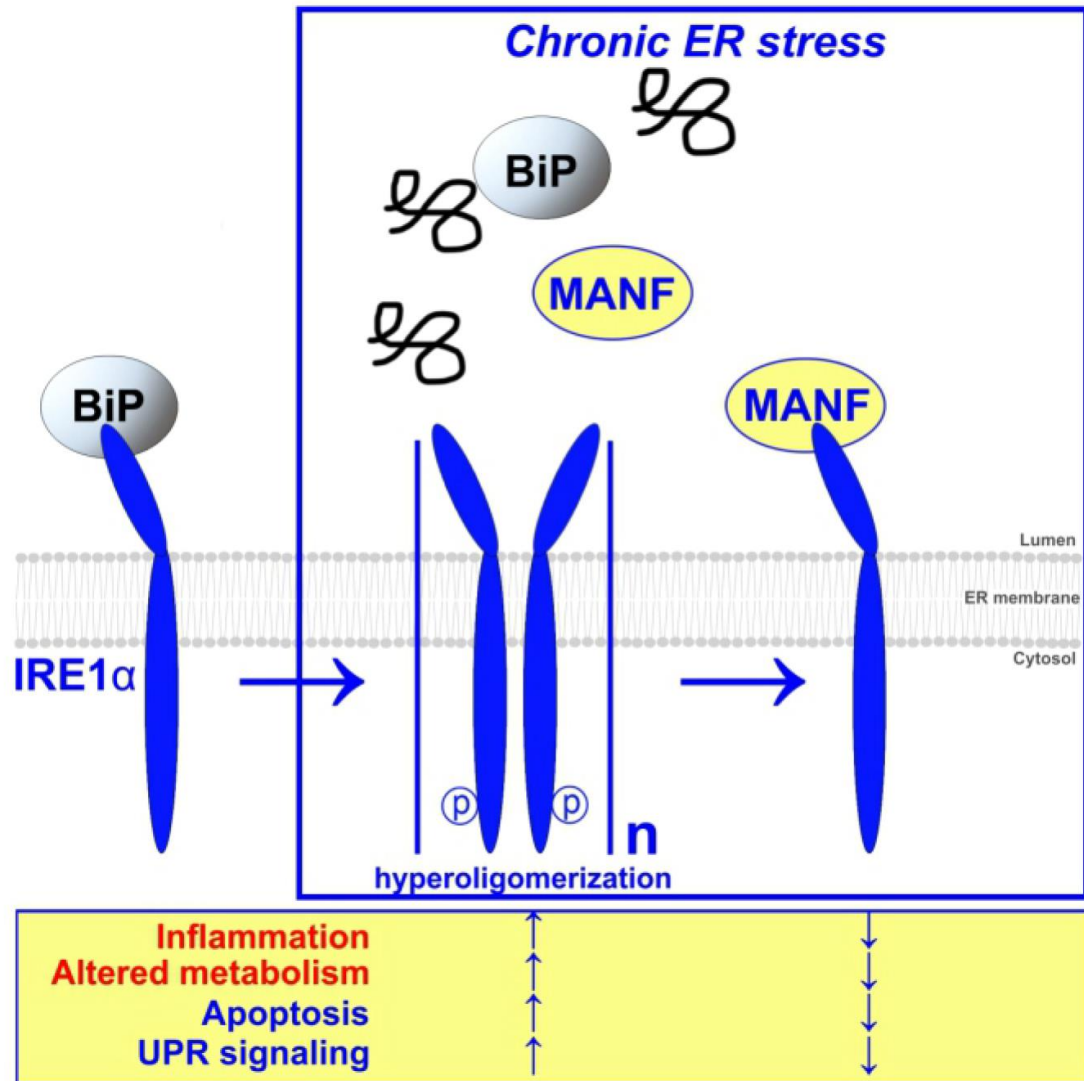

**Fig. 8 | Putative mechanism of MANF signaling through IRE1α.**

Upon ER stress when BiP dissociates from IRE1α luminal domain, MANF directly binds to IRE1α preventing IRE1α hyperligomerization and decreasing IRE1α phosphorylation, resulting in neuroprotective and neurorestorative effect both *in vitro* and *in vivo*.

**Table 1.** The analysis of the frequency of the appearance of each interacting amino acid residue in computational complex configurations 1- 30.

| MANF amino acids residues | Interactions |         |                |
|---------------------------|--------------|---------|----------------|
|                           | Total        | Total % | Hydrogen bonds |
| Met94                     | 26           | 86,7    | 10             |
| Gly95                     | 11           | 36,7    | 0              |
| Lys96                     | 9            | 30,0    | 3              |
| Tyr97                     | 27           | 90,0    | 2              |
| Asp98                     | 24           | 80,0    | 3              |
| Lys99                     | 29           | 96,7    | 0              |
| Gln100                    | 26           | 86,7    | 4              |
| Ile101                    | 24           | 80,0    | 0              |
| Ser104                    | 17           | 56,7    | 2              |
| Thr105                    | 16           | 53,3    | 2              |
| Lys150                    | 22           | 73,3    | 1              |
| Ser153                    | 10           | 33,3    | 1              |
| Ala154                    | 14           | 46,7    | 3              |
| Arg155                    | 23           | 76,7    | 7              |
| Thr156                    | 19           | 63,3    | 3              |
| Asp157                    | 18           | 60,0    | 2              |
| Leu158                    | 23           | 76,7    | 0              |

**Table 2.** Analysis of the frequency of the appearance of interacting amino acid residues of the disulfide bridge of the MANF in computational complex configurations 31-60.

| MANF amino acids residues | Interactions |         |                |
|---------------------------|--------------|---------|----------------|
|                           | Total        | Total % | Hydrogen bonds |
| Cys127                    | 7            | 23,3    | 0              |
| Lys128                    | 7            | 23,3    | 2              |
| Gly129                    | 6            | 20,0    | 1              |
| Cys130                    | 7            | 23,3    | 0              |

## Supplementary Figure 1

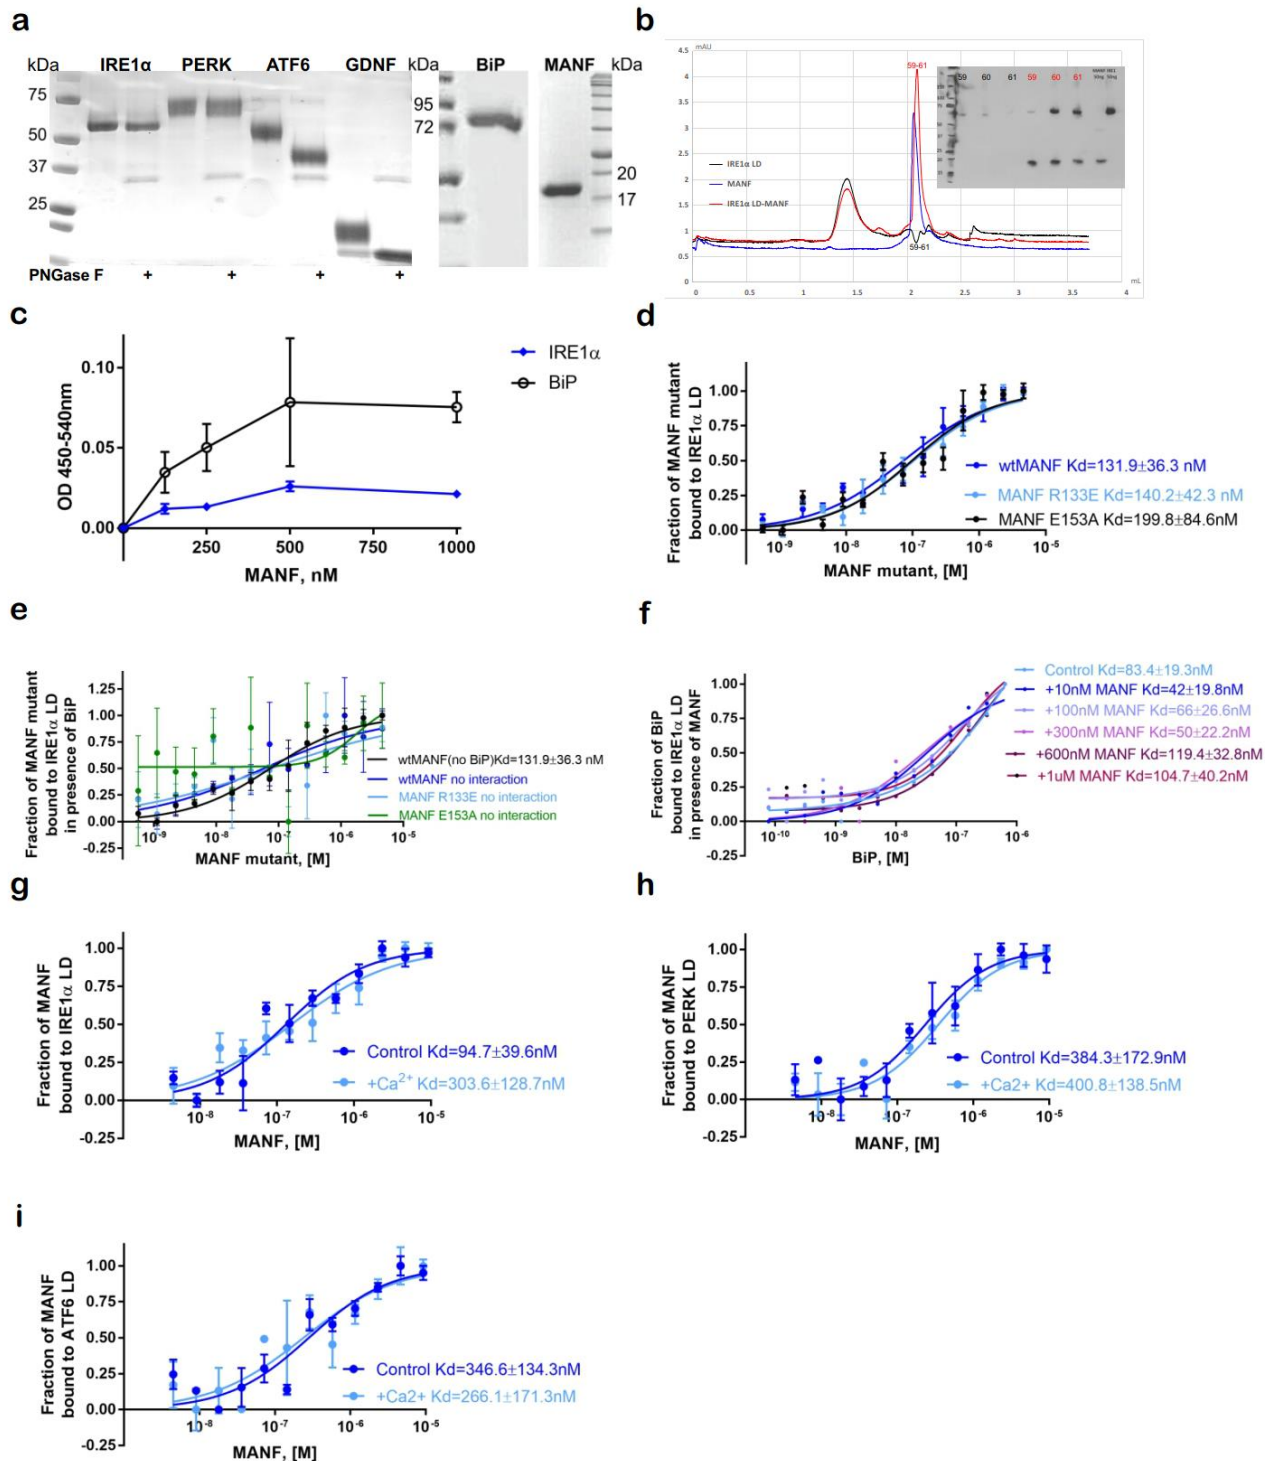

### Supplementary Figure 1.

MANF interaction with luminal domains of UPR sensors

(A) SDS-PAGE gel of purified from *CHO* cells luminal domains of UPR sensors IRE1 $\alpha$ , PERK and ATF6, *E.coli* produced human recombinant BiP and *CHO* cells produced human recombinant MANF. Glycosylation of LDs of UPR sensors was tested using PNGase F assay.

- (B) MANF and IRE1 $\alpha$  LD form a complex, as shown by SEC, followed by western blotting using MANF and His-tag antibodies. Red curve-IRE1 $\alpha$  LD alone, blue curve-MANF alone, black curve-IRE1 $\alpha$  LD complex.
- (C) Recombinant purified human MANF protein is interacting with BiP-His and IRE1 $\alpha$  LD-His proteins on Pierce<sup>TM</sup> nickel coated plates. Relative absorbance at 450nm-540nm is indicated.
- (D) Interaction of unlabeled titrated human recombinant *CHO* cells produced deficient for BiP binding MANF E153A and MANF R133E (0-4.6  $\mu$ M) with Alexa647-labeled through His-tag luminal domains of IRE1 $\alpha$  LD (20nM), analyzed using MST. Microscale thermophoresis binding curves, showing mean fraction bound values from n=3 individual repeats per binding pair  $\pm$ SEM, Kd values $\pm$ error estimations are indicated.
- (E) Interaction of unlabeled titrated human recombinant *CHO* cells produced deficient for BiP binding MANF E153A and MANF R133E (0-4.6  $\mu$ M) with Alexa647-labeled through His-tag luminal domains of IRE1 $\alpha$  LD (20nM) in presence of 50 nM BiP, analyzed using MST. Microscale thermophoresis binding curves, showing mean fraction bound values from n=3 individual repeats per binding pair  $\pm$ SEM, Kd values $\pm$ error estimations are indicated.
- (F) Interaction of unlabeled titrated human recombinant BiP (0-640nM) with Alexa647-labeled through His-tag luminal domain of IRE1 $\alpha$  (20nM) in presence of increasing concentrations of human recombinant MANF (10nM-1 $\mu$ M). Microscale thermophoresis binding curves, showing mean fraction bound values  $\pm$ SEM, Kd values $\pm$ error estimations are indicated.
- (G)–(H) Interaction of unlabeled titrated human recombinant MANF (0-9.3 $\mu$ M) with Alexa647-labeled through His-tag luminal domain of IRE1 $\alpha$  (20nM) in presence of increasing concentrations of Ca<sup>2+</sup> concentration (100 $\mu$ M-2.5mM). Microscale thermophoresis binding curves, showing mean fraction bound values from n=3 individual repeats per binding pair  $\pm$ SEM, Kd values $\pm$ error estimations are indicated.

## Supplementary Figure 2

**a**

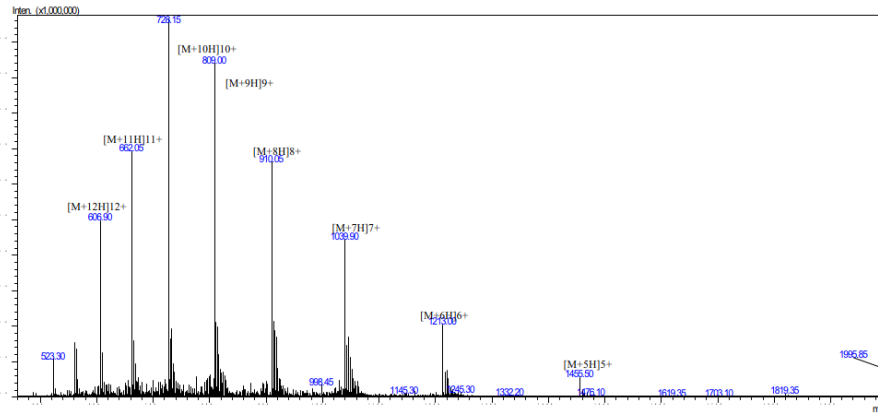

|                            |                     |                    |                         |
|----------------------------|---------------------|--------------------|-------------------------|
| Sample Description         | Instrument          | SHIMADZU LCMS-2020 |                         |
| Analyzed date: 2018/7/30   | Probe:              | ESI                | Probe Bias: +4.5kv      |
| Analyst: Shen              | Nebulizer Gas Flow: | 1.5L/min           | Detector: 1.2kv         |
| Sample: KL-63              | CDL:                | -20.0v             | T. Flow: 0.2ml/min      |
| M.W.: 7271.56              | CDL Temp.:          | 250 °C             | B. Conc.: 50%H2O/50%ACN |
| Lot. No.: P180625-LR663040 | Block Temp.:        | 400 °C             |                         |

**b**

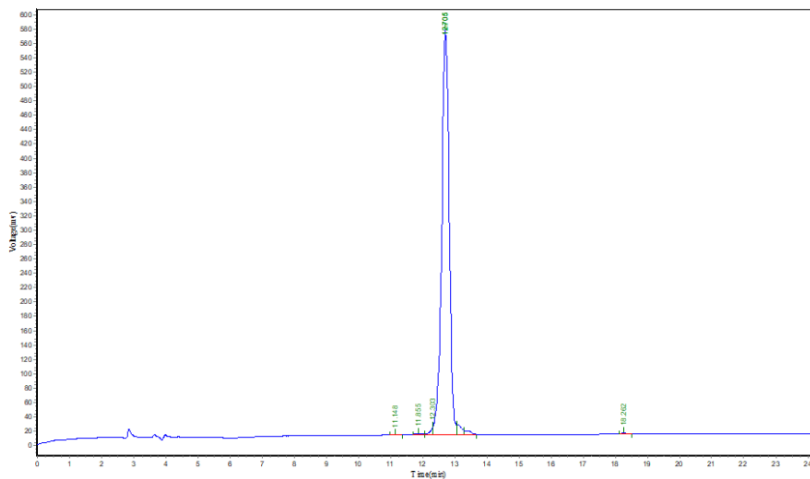

KL-63  
 KYDKQIDLSTVDLKKLRVKELKKLDD  
 WGETCKGCAEKSDYIRKINELMPKYA  
 PKAASARTDL (disulfide bond)

Sample: LY  
 Analyst: LY  
 Lot. No.: P180625-LR663040  
 Column: Kromasil-C18, 4.6\*250mm, 5µm  
 Solvent A: A: 0.1% Trifluoroacetic Acid in 100% Acetoni  
 Solvent B: B: 0.1% Trifluoroacetic Acid in 100% Water  
 Gradient:

|         | A    | B    |
|---------|------|------|
| 0.0min  | 40%  | 60%  |
| 25.0min | 90%  | 10%  |
| 25.1min | 100% | 0%   |
| 30.0min |      | Stop |

Volume: 10µl  
 Wavelength: 220nm  
 Flow rate: 1.0ml/min

| Peak No | Ret Time | Height     | Area        | Conc.   |
|---------|----------|------------|-------------|---------|
| 1       | 11.148   | 479.275    | 6256.433    | 0.0664  |
| 2       | 11.855   | 1435.596   | 19324.496   | 0.2049  |
| 3       | 12.303   | 10091.813  | 50010.527   | 0.5304  |
| 4       | 12.705   | 563810.313 | 9120283.000 | 96.7258 |
| 5       | 12.705   | 13930.387  | 140884.922  | 1.4942  |
| 6       | 12.705   | 5793.339   | 76369.352   | 0.8099  |
| 7       | 18.262   | 1718.066   | 15883.589   | 0.1685  |
| Total   |          |            |             | 100.00  |

**c**

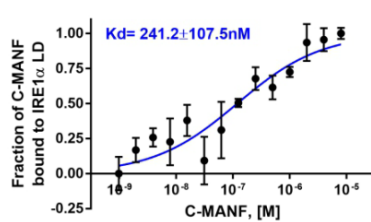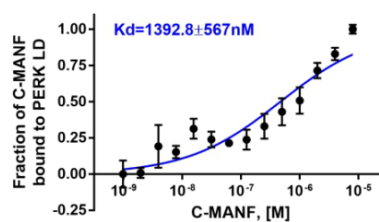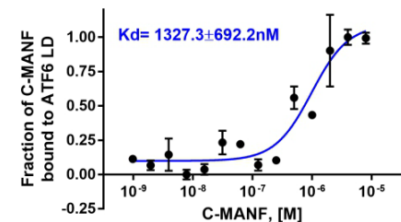

## Supplementary Figure 2.

Properties of chemically synthesized and *E. coli* expressed C-MANF

- (A) C-MANF forms a single disulfide bond between Cys128 and Cys130 as shown by mass spectrometry (MS)
- (B) C-MANF is homogeneous as shown by high-performance liquid chromatography (HPLC)
- (C) *E. coli* produced C-MANF (0-8  $\mu$ M) is interacting with labeled through His-tag LDs of UPR sensors IRE1 $\alpha$ , PERK, ATF6 (20nM). Microscale thermophoresis binding curves, showing mean fraction bound values from n=3-4 experiments per binding pair  $\pm$ SEM, Kd values  $\pm$ error estimations are indicated.



## Supplementary Figure 3

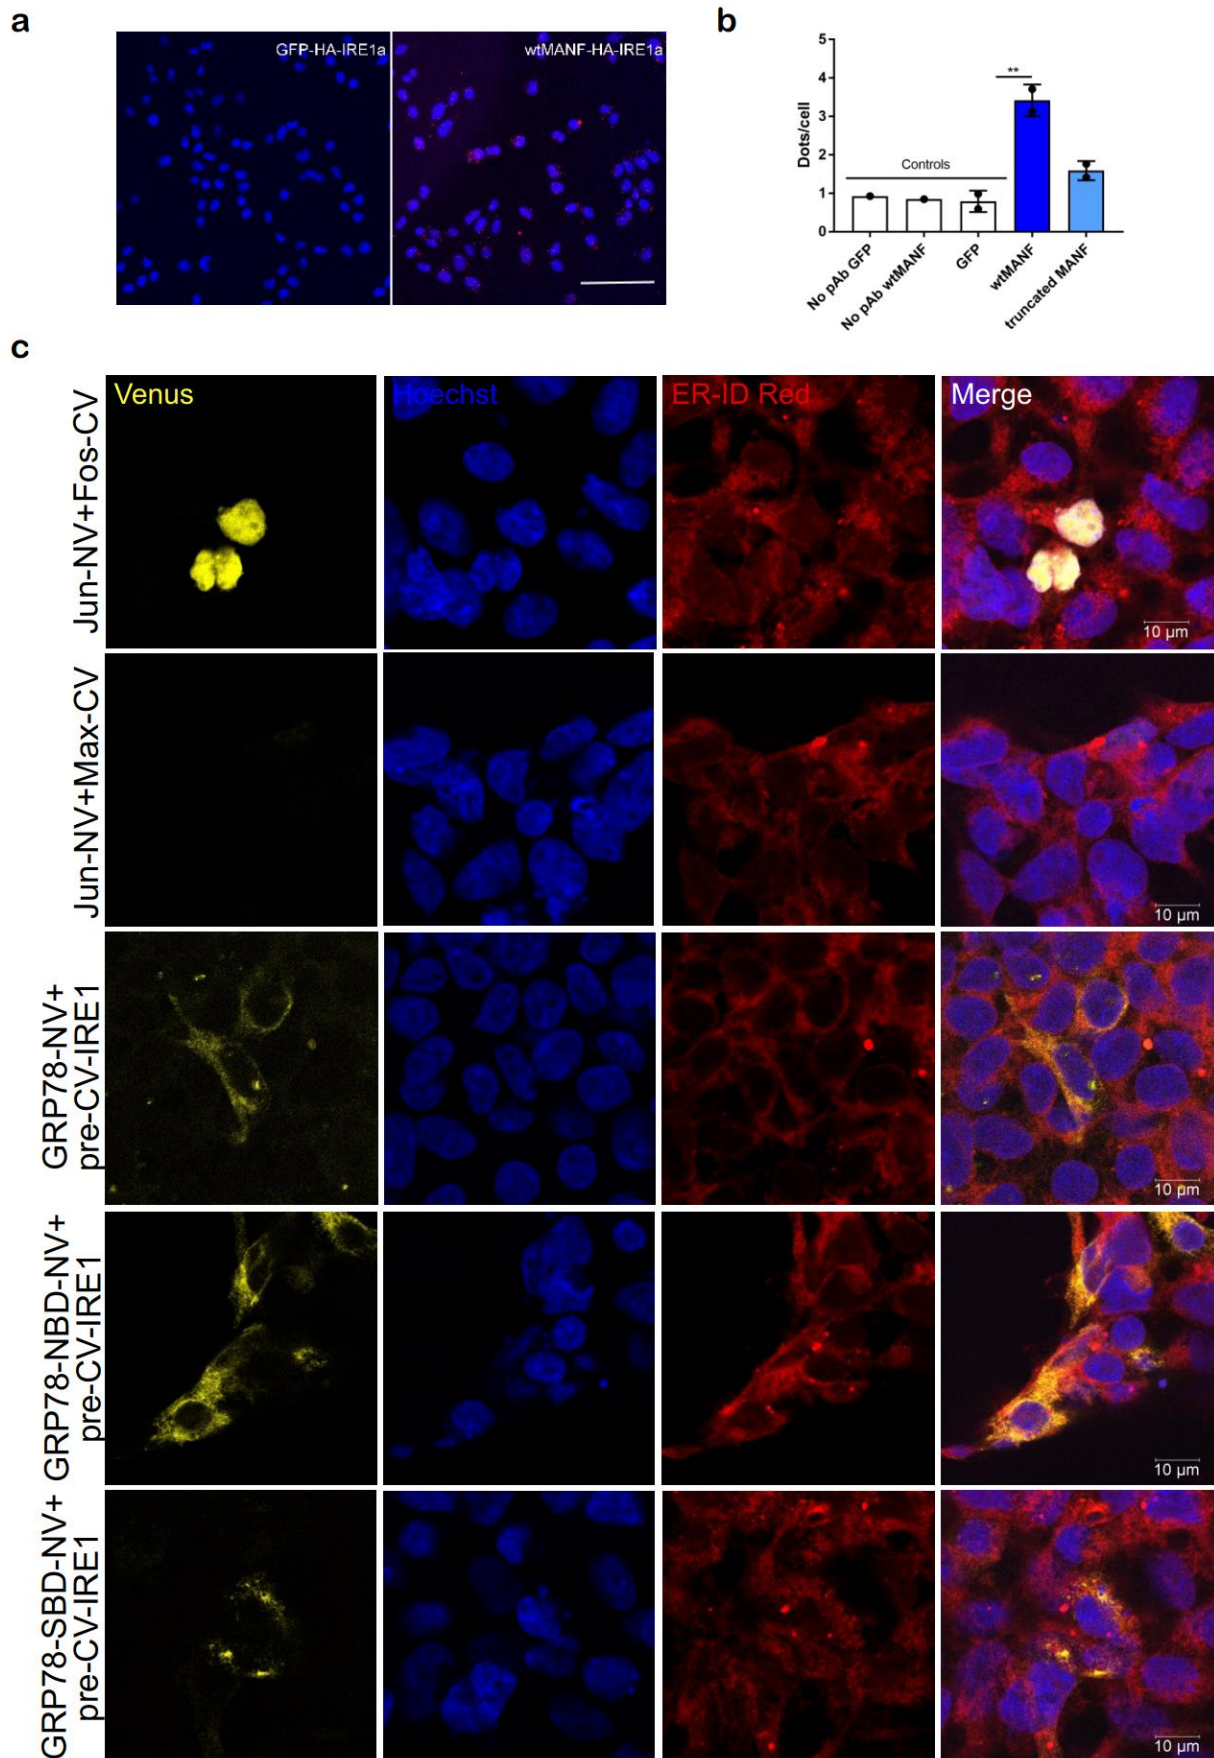

### **Supplementary Figure 3.**

MANF is interacting with IRE1 $\alpha$  in CHO cells

- (D) MANF-HA interaction with IRE1 $\alpha$  in CHO cells, shown using Duolink<sup>TM</sup> proximity ligation assay
- (E) Quantification of MANF interaction with IRE1 $\alpha$  in CHO cells, n=3
- (F) IRE1 $\alpha$  is mainly interacting with nucleotide binding domain of BiP (BiP-NBD) and not substrate binding domain of BiP (BiP-SBD). BIFC data, n=3.



## Supplementary Figure 5

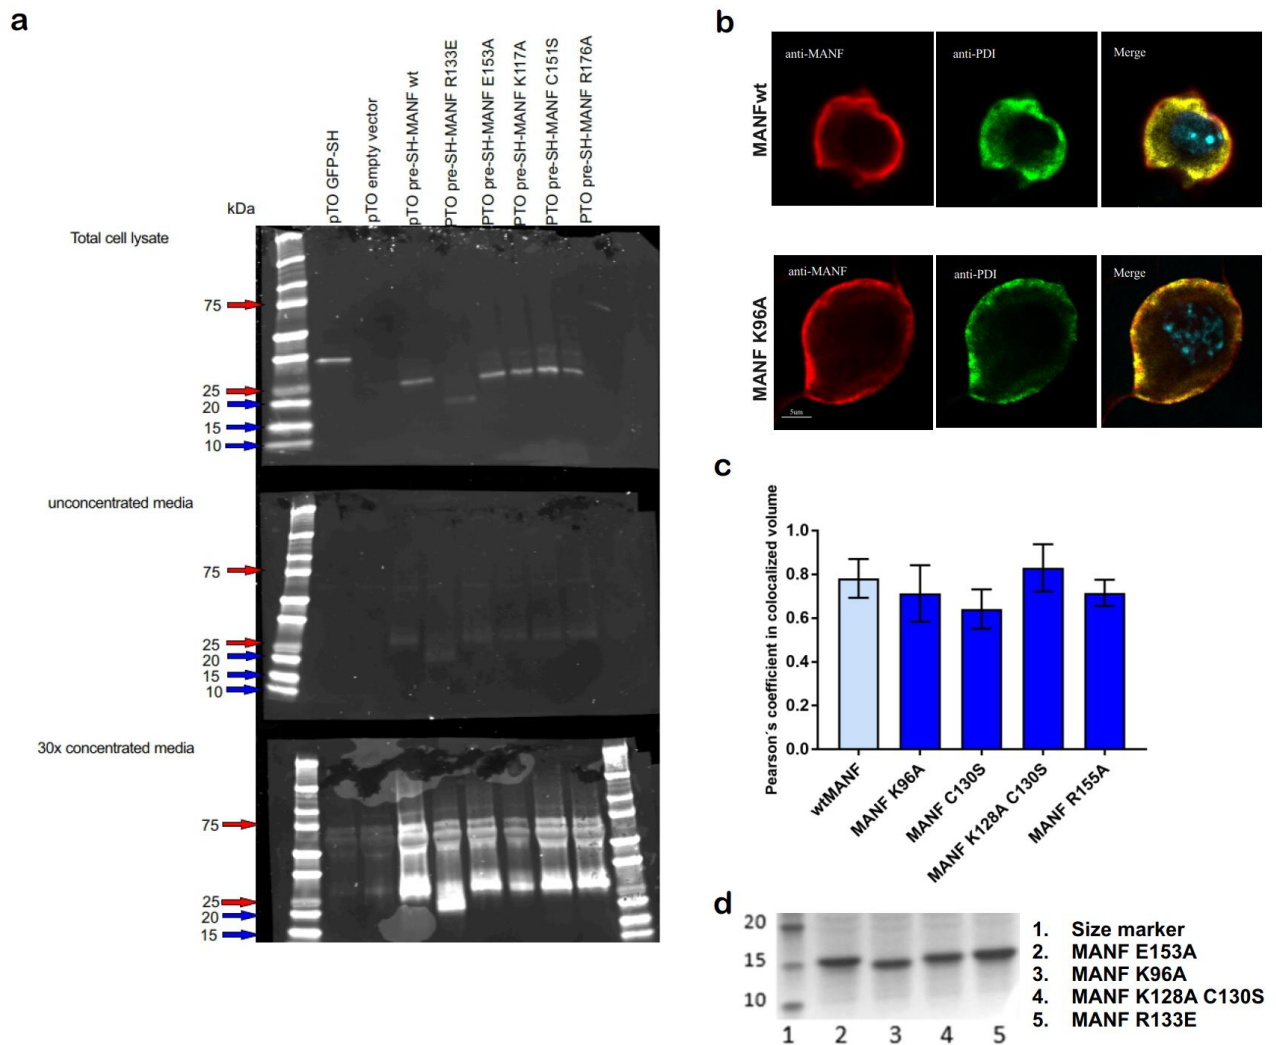

### Supplementary Figure 5.

Mutant human recombinant MANF proteins are expressed, secreted and localized in cells similarly to wtMANF

- (A) Expression and secretion of putatively deficient for IRE1 $\alpha$  LD binding MANF mutant constructs in HEK293 cells
- (B) Localization of putatively deficient for IRE1 $\alpha$  LD binding MANF mutant constructs in SCG neurons is similar to that of wtMANF construct (ICC). Representative image of wtMANF and MANF K96A, scale bar 5 $\mu$ m.
- (C) Localization of putatively deficient for IRE1 $\alpha$  LD binding MANF mutant constructs in SCG neurons is similar to that of wtMANF construct (ICC). Quantification of Pearson's coefficient in colocalized volume for different MANF mutants, n=5 independent experiments.
- (D) SDS-PAGE gel electrophoresis of purified from *CHO* cells human recombinant MANF K96A and MANF K128AC130S proteins (bands 3 and 4, correspondently), non-reducing conditions, Coomassie blue staining.

## Supplementary Figure 6

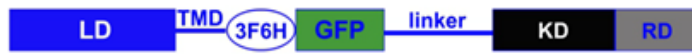

### Supplementary Figure 6.

The scheme of IRE1 $\alpha$ -3FGH-GFP construct
